# Supplementary material
Source: ML conference proceedings conference paper supplement (https://openreview.net/forum?id=3tj3A26wsV)
Supplement: supplementary_material [file attachment]

---

# A theoretical case-study of Scalable Oversight in Hierarchical Reinforcement Learning

---

Anonymous Author(s)

Affiliation

Address

email

## Abstract

1 A key source of complexity in next-generation AI models is the size of model  
2 outputs, making it time-consuming to parse and provide reliable feedback on. To  
3 ensure such models are aligned, we will need to bolster our understanding of  
4 scalable oversight and how to scale up human feedback. To this end, we study  
5 the challenges of scalable oversight in the context of goal-conditioned hierarchi-  
6 cal reinforcement learning. Hierarchical structure is a promising entrypoint into  
7 studying how to scale up human feedback, which in this work we assume can only  
8 be provided for model outputs below a threshold size. In the cardinal feedback  
9 setting, we develop an apt sub-MDP reward and algorithm that allows us to acquire  
10 and scale up low-level feedback for learning with sublinear regret. In the ordinal  
11 feedback setting, we show the necessity of both high- and low-level feedback,  
12 and develop a hierarchical experimental design algorithm that efficiently acquires  
13 both types of feedback for learning. Altogether, our work aims to consolidate the  
14 foundations of scalable oversight, formalizing and studying the various challenges  
15 thereof.

## 16 1 Introduction

17 Next-generation AI models are poised to produce sophisticated outputs such as long-form texts and  
18 videos, and execute complex tasks as agents. To build these AIs responsibly, we need to better  
19 our understanding of scalable oversight: the ability to provide *scalable* human feedback to these  
20 complex models [2, 8, 15, 5]. An immediate, key challenge to overcome is the size of model  
21 outputs, making it time-consuming for humans to parse and provide reliable feedback on, even with  
22 AI-assistance [24, 27, 23]. To this end, in this work, we consider human labelers with bounded  
23 processing ability such that accurate feedback can only be provided for outputs below some threshold  
24 size. We are interested in answering the question: how can we scale this limited feedback to supervise  
25 a model with outputs *larger* than this limit?

26 Verily, this task is difficult without further assumptions. If the model output can only be assessed  
27 in its entirety, it is impossible for humans to provide reliable feedback. Thus, we investigate a  
28 natural setup that gives us hope to overcome the limitation in feedback — when model outputs have  
29 *hierarchical* structure. Hierarchical structure exists in many high-dimensional outputs of interest,  
30 including long-form texts (books made up of chapters), videos (movies made up of scenes) and code  
31 (main functions made up of helper functions). Indeed, it reflects the way we humans produce many  
32 of our most complex creations.

33 To formalize the setting, we study scalable oversight in a goal-conditioned hierarchical reinforcement  
34 learning (HRL) setup. Goal-oriented RL is a popular approach that has seen sizable success in  
35 leveraging state space structure to overcome sparse rewards over long horizons [16, 17, 10]. Our  
36 aim in this paper differs in using this as an entry-point into understanding how to scale up bounded

human feedback, and formalizing the conceptual/technical challenges thereof. It turns out that one known advantage of HRL, besides more efficient exploration and efficient credit assignment, is the ability to enable scalable oversight.

## 1.1 Preliminaries

We consider a finite-horizon, Markov Decision Process (MDP)  $\mathcal{M} = \langle S, A, P, r, s_1, H \rangle$ , with finite state space  $S$ , finite action space  $A$ , transition probability  $P : S \times A \rightarrow \Delta(S)$ , reward  $r(s, a) : S \times A \rightarrow [0, 1]$  and finite horizon  $H = H_h H_l$ . The learner interacts with  $\mathcal{M}$  starting at  $s_1$  and the episode ends after  $H$  time-steps.

**Accompanying Example:** Consider the task of learning to generate a long-form, argumentation essay. Providing feedback to an end-to-end policy is difficult as labelers would have to read through entire essays to rate the outputs, after which it may be difficult still to assign a single rating to the entire essay. A tractable alternative is to learn a hierarchical model, with a higher-level policy that generates the essay arguments (goals), and lower-level policies that flesh out these points (realize these goals). It would then be easier for the labeler to rate the shorter-length essay content, and also individual fleshed out arguments, in order to generate a rating on the whole. This approach also mirrors existing rubrics for scoring essays [1].

**Bounded Feedback:** To formalize the motivation above, we assume that for global policy  $\pi : S \rightarrow A$ , it is infeasible to obtain reliable feedback for its trajectory  $\tau \sim \pi, P$  as  $|\tau| = H_h H_l$ . Instead, we assume that the labeler can provide reliable feedback for trajectories of size  $H_h$  or  $H_l$ . This thus motivates hierarchical learning, which makes possible the acquisition of reliable feedback.

### 1.1.1 Goal-conditioned HRL

We are interested in learning a hierarchical policy consisting of a high-level policy  $\pi^h : S \rightarrow \Delta(A_h)$  (takes actions in high-level action space  $A_h$ ), and a set of low-level/sub-policies  $\pi_{s,a}^l : S_{s,a}^l \rightarrow \Delta(A)$ .  $S_{s,a}^l \subseteq S$  and consists of all states reachable from  $s$  after  $H_l$  steps. The high-level policy designates goals. The low-level policies aims to realize such goals, while achieving high intermediate returns.

**Goal Function:** we assume access to a function  $g$  mapping high-level action  $a^h$  at state  $s$  to a goal-state  $g(s, a^h) \in S_{s,a}^l$ . For example,  $s$  is the current content of the essay,  $a^h$  is the action (in natural language) “add an argument using X” and  $g(s, a^h)$  is the content of the essay with the “argument using X” included.

**Interaction Protocol:** At each time-step  $t$ , the high level policy chooses a high level action  $a^t$  based on current state  $s^t$ , thus defining the sub-goal state  $g(s^t, a^t)$ . This induces a sub-MDP  $M(s^t, a^t)$  with finite-horizon  $H_l$ , in which sub-policy  $\pi_{s,a}^l$  is run for  $H_l$  time steps to try to achieve the goal. Let  $\Pr(s_{H_l}^{\pi_{s_i, a_i}^l})$  denote the distribution over the (final)  $H_l$ th state that  $\pi_{s_i, a_i}^l$  reaches. The overall return of the hierarchical policy  $(\pi^h, \{\pi_{s,a}^l\})$  is the sum of intermediate returns  $r(\pi_{s_i, a_i}^l)$ :

$$V^{\pi^h, \pi_{s,a}^l}(s_1) = \mathbb{E}_{a_i' \sim \pi^h(s_i), s_{i+1}' \sim \Pr(s_{H_l}^{\pi_{s_i, a_i}^l})} \left[ \sum_{i=1}^{H_h} r(\pi_{s_i', a_i'}^l) | s_1' = s_1 \right].$$

**Goal-conditioned sub-MDP:** In more detail, sub-MDP  $M(s, a)$  is defined by high-level action  $a \in A^h$  and state  $s \in S$ .  $M(s, a)$  has state space  $S_{s,a}^l \subseteq S$ , action space  $A$  (action space of the original  $\mathcal{M}$ ), transition probabilities  $P$  restricted to  $S_{s,a}^l$ , starting state  $s$  and finite horizon  $H^l$ . The sub-MDP reward  $r^l$  will be defined later and as we will see, an apt choice is crucial for learning with sublinear regret.

**High-level MDP:** Given a set of low-level policies,  $\pi^h$  may be thought of as operating over a high-level MDP with state space  $S$ , action space  $A^h$ , starting state  $s_1$  and finite horizon  $H^h$ . Importantly, the high-level transition  $P'$  of this MDP is a function of the current set of low-level policies, which may not necessarily reach the sub-goal state (especially at the start):  $\Pr'(s'|s, a) = \Pr(s_{H_l}^{\pi_{s,a}^l} = s')$ . Similarly, the high-level reward  $r^h(s, a) = \mathbb{E}_{s_j, a_j \sim \pi_{s,a}^l, P} [\sum_{j=1}^{H_l} r(s_j, a_j) | s_1 = s]$  is the intermediate return of sub-policy  $\pi_{s,a}^l$  in  $M(s, a)$ . A key complication in hierarchical learning is that the transitions and rewards in the high-level MDP are non-stationary, as sub-policies  $\pi_{s,a}^l$  are updated over time.

78 **Instantiation in the Example:** returning to our example, for a cogent essay, the arguments need to be  
79 logically related and built on top of each other. This results in a sequential decision making problem  
80 corresponding to the one solved by the high level policy  $\pi^h$ . Given an argument  $g(s, a)$  to flesh out,  
81 the low level policy  $\pi_{s,a}^l$  generates up to  $H_l$  words, whose content aims to realize this argument.  
82 Additionally, low-level policies can incur intermediate rewards (return) for eloquent diction and clear  
83 structure when fleshing out the argument, all of which add to the essay’s persuasiveness and score.

### 84 1.1.2 Learning Task

85 Our aim is to learn a hierarchical policy, whose return is close to that of the optimal, goal-reaching  
86 hierarchical policy as we define below.

87 **Assumption 1** (Goal-Reachability). *In every sub-MDP  $M(s, a)$ , there exists a policy that achieves*  
88 *the goal  $g(s, a)$  almost surely. That is, there exists at least one policy  $\pi \in \Pi_{s,a}$  in the policy class*  
89  *$\Pi_{s,a}$  such that  $\Pr(s_{H_l}^{\pi} = g(s, a)) = 1$ .*

90 In other words, we assume that the goal function  $g$  is well-defined in that it designates goals that  
91 are feasible to reach from the starting state  $s$  (e.g. the argument can be successfully fleshed out in  
92  $H_l$  words or less given the essay content thus far). With this assumption, let  $C$  be some constant  
93 large enough s.t. if  $\pi \in \arg \max_{\pi \in \Pi_{s,a}} r(\pi) + C \cdot \Pr(s_{H_l}^{\pi} = g(s, a))$ , then  $\pi$  is goal-reaching,  
94  $\Pr(s_{H_l}^{\pi} = g(s, a)) = 1$ .

95 **Definition 1.** *Define optimal low-level policies as  $\pi_{s,a}^* \in \arg \max_{\pi \in \Pi_{s,a}} r(\pi) + C \cdot \Pr(s_{H_l}^{\pi} =$*   
96  *$g(s, a))$ . Define optimal high-level policy as  $\pi^* = \arg \max_{\pi \in \Pi^h} V^{\pi, \pi_{s,a}^*}(s_1)$ .*

97 In words,  $\pi_{s,a}^*$  has the highest intermediate return of all goal-reaching policies.  $\pi^*$  is the optimal  
98 high-level policy fixing each sub-MDP policy to be  $\pi_{s,a}^*$ .

99 **Learning Goal:** We wish to learn a set of near-optimal high- and low-level policies  $(\pi, \{\pi_{s,a}\})$  such  
100 that:  $V^{\pi^*, \pi_{s,a}^*}(s_1) - V^{\pi, \pi_{s,a}} \leq \epsilon$ .

### 101 1.1.3 Parametric Rewards

102 Beyond the tabular setting, we also consider parametric reward functions, specifically the commonly  
103 studied linear setting.

104 **Assumption 2** (Linear Reward Parametrization). *Suppose we have access to some feature map*  
105  *$\phi : S \times A \rightarrow \mathbb{R}^d$ ,  $\mathcal{M}$  has linear reward parametrization w.r.t.  $\phi$  if there exists an unknown, reward*  
106 *vector  $\theta^* \in \mathbb{R}^d$  such that  $r(s, a) = \langle \phi(s, a), \theta^* \rangle$  for all  $s, a \in S \times A$ .*

107 Given trajectory  $\tau = (s_1, a_1, \dots, s_H, a_H)$ , we may then define trajectory feature  $\phi(\tau) =$   
108  $\sum_{s_i, a_i \in \tau} \phi(s_i, a_i)$ , and policy feature expectation under transitions  $P$ ,  $\phi^P(\pi) = \mathbb{E}_{\tau \sim \pi, P}[\phi(\tau)]$ .

### 109 1.2 Takeaways

- 110 • Under cardinal feedback, we develop a novel no-regret learning Algorithm 1 that learns  
111 from low-level feedback only. Our main structural result shows that goal-conditioned HRL  
112 reduces to multi-task, sub-MDP regret minimization. Hence, the regret from the low-level  
113 builds up additively (and not say multiplicatively), as speculated about in [15].  
114 Our main insights are that apt sub-MDP reward design, and particularly suitable penalty for  
115 non-goal reachability, is needed for bounding regret and controlling the exit state of learned  
116 low-level policies (s.t. learned policies do not land at bad states with sizable probability).  
117 Doing so allows one to compose low-level policies together and stabilize learning in the high-  
118 level MDP. Additionally, no-regret algorithms are useful sub-routines for sub-MDP learning.  
119 The regret guarantee directly implies UCBs that are useful learning in the high-level MDP.
- 120 • Under ordinal feedback, we develop a novel hierarchical experiment-design algorithm. We  
121 study when low-level feedback is sufficient for experiment design, showing that while it is  
122 not sufficient, it is beneficial in terms of sample complexity when it is sufficient. And when  
123 it is insufficient, we show how one can explore in the high level MDP, and the associated  
124 rates under two types of feedback that impose differing cognitive loads on the labeler.

## 2 Related Works

**HRL under cardinal rewards:** There has been sizable interest in understanding of the sample complexity of HRL algorithms, which to our knowledge has thus focused on learning from cardinal rewards. On this subject, the two closest papers to that of ours are [22] and [25]. [22] studies goal-conditioned HRL with the key result being a sample complexity lower bound associated with a given hierarchical decomposition. On the upper-bound side, an algorithm (SHQL) is presented, albeit without theoretical guarantees. By contrast, our work presents a learning algorithm with provable guarantees, and further shows that learning in goal-conditioned HRL reduces to multi-task, sub-MDP regret minimization.

[25] studies HRL under the options framework, providing a model-based, Bayesian algorithm with access to a prior distribution over MDPs that is updated over time. It does not adaptively learn sub-policies based on observed returns, computing instead an option for every exit-profile and equivalence class at each time during model-based planning. By contrast, our work does not assume knowledge of the prior nor ability to update posteriors, and does adaptively explore sub-MDPs via the UCB principle. Additionally, [25] demonstrate that when the size of the set of exit (“bottleneck”) states is small, learning is efficient. Our work shed further light on this insight by showing that under a suitable sub-MDP reward, we can induce a small set of exit states *with high probability*. Thus, even though the total number of possible exit-states may be high, this condition is sufficient for learning with sublinear-regret.

**RL under ordinal rewards:** There has also been considerable interest in bandits/RL from preferences [26, 28, 18, 14, 30, 29]. Following the demonstrated success of RLHF [9, 31, 19, 4], there has been great interest in studying offline RL from preference feedback, and particularly experiment design for enhanced sample efficiency [30, 29]. Due to the success of RLHF in alignment, we also consider studying scalable oversight in this setup. Please see the Appendix A for further discussions on scalable oversight and goal-conditioned RL.

## 3 Learning from Cardinal Feedback

We begin by considering the setting when feedback is in the form of cardinal rewards. As noted before, in HRL, the high-level policy performance is dependent on the low-level policies performance. Thus, a naive approach is to learn near-optimal sub-policies in every sub-MDP  $M(s, a)$ , and then learn a high-level policy on top. However, a more sample efficient approach is to strategically explore sub-MDPs, and discover sub-policies with high intermediate returns in tandem with a high level policy that visits these “good” sub-MDPs. Please see the Appendix B for all the proofs. Note that in what follows, for brevity, theoretical statements will contain the phrase “with high probability” and the appendix will contain proofs that formalize this guarantee.

### 3.1 Sub-MDP reward design for H-UCB-VI

We are interested in adaptively learning the necessary sub-policies (the useful goals to achieve) and the associated high level policy that invokes these sub-policies. It is natural then to adopt an upper confidence bound approach and construct an exploration bonus that tracks the best/unexplored sub-MDPs. To this end, we develop an adaptation of the classic UCB-VI algorithm [3]. We highlight two key ingredients needed to construct the H-UCB-VI Algorithm 1.

**Tradeoffs in sub-MDP reward design:** Learned sub-policies in HRL have to tradeoff between two objectives. One is high intermediate returns  $r(\pi_{s,a})$ . The other is that exit-state; sub-policies should not land at “bad” states, as even if the intermediate return is high,  $V(s_{H_l}^{\pi_{s,a}}) \approx 0$  means the return from hereon out (and hence the overall return) will be low. Thus, in sub-policy learning, we also need to consider the goodness of the exit-state. But how can we incentivize sub-policies to land at “good” states without being able to calculate  $V$ ? Luckily, in the goal-conditioned setting, there is a natural answer for a “good” exit-state:  $g(s, a)$ .

To operationalize this, we design a sub-MDP reward that trades-off between intermediate sub-MDP return and goal-reachability. In sub-MDP  $M(s, a)$ , at time-step  $h$ , sub-MDP reward  $r_{l,h}(s', a') = r(s', a') + \kappa \mathbf{1}(h = H_l \wedge s' = g(s, a))$ . Crucially, here we set the weighting  $\kappa = \max(2H_h H_l, C)$ , which corresponds to an upper bound on the regret should we not reach the goal-state.

---

**Algorithm 1** Hierarchical-UCB-VI (H-UCB-VI)

---

```

1: Initialize:  $D = \emptyset$ ,  $Q_{H_h+1}(s, a) = H_h H_l \forall s, a$ ,  $V_{H_h+1} = 0$ ,  $\kappa = \max(C, 2H_h H_l)$ , cluster
   index function  $c(s, a)$  over sub-MDP clusters  $\mathcal{C}(S, A^h)$ 
2: for episode  $k = 1, \dots, K$  do
3:   for timestep  $i = H_h, \dots, 1$  do ▷ value iteration with bonus
4:     for  $(s, a) \in S \times A^h$  do
5:       if  $(s, a) \in D$  then
6:         Update UCB:  $UB(r^{\pi^*}(s, a)) = \bar{r}_{N^{k,h}(s,a)}(s, a) + b_r^{s,a}(N^{k,h}(s, a))$  ▷
            $N^{k,h}(s, a)$  is the number of visits to  $M(s, a)$  at episode  $k$ , time-step  $h$ 
7:         Set:
           
$$Q_i(s, a) = \min(H_h H_l, UB(r^{\pi^*}(s, a)) + V_{i+1}(g(s, a))) \quad (1)$$

8:       for  $s \in S$  do
9:          $V_i(s) = \max_{a \in A^h} Q_i(s, a)$ 
10:      for time step  $h = 1, \dots, H_h$  do
11:        Take greedy high-level action  $a_h^k = \arg \max_{a \in A^h} Q_h(s_h^k, a)$ 
12:        Traverse sub-MDP  $M(s_h^k, a_h^k)$  with current sub-policy  $\pi_{s_h^k, a_h^k}^{N^{k,h}}$  and transition to  $s_{h+1}^k$ ,
           obtain high-level reward  $r(s_h^k, a_h^k) = r(\pi_{s_h^k, a_h^k}^{N^{h,k}})$ , the intermediate return of  $\pi_{s_h^k, a_h^k}^{N^{h,k}}$  in  $M(s_h^k, a_h^k)$ 
           ▷ labeler provides the return of length- $H_l$  roll-out of  $\pi_{s_h^k, a_h^k}^{N^{h,k}}$ 
13:        Feed  $r(\pi_{s_h^k, a_h^k}^{N^{h,k}}) + \kappa \mathbb{1}(s_{h+1}^k = g(s_h^k, a_h^k))$  into no-regret RL algorithm  $\mathcal{A}_{c(s,a)}$ , where
            $c(s, a)$  is the cluster  $M(s, a)$  belongs to ▷ shared learning if repeated structure in sub-MDP
14:        Add to dataset  $D = D \cup \{(h, s_h^k, a_h^k, r(s_h^k, a_h^k))\}$ 

```

---

176 **UCB construction:** Next, we wish to obtain an UCB for  $r(\pi_{s,a}^*)$ . Our main observation is that by  
 177 using a no-regret subroutine for learning in  $M(s, a)$ , the regret guarantee directly translates to a UCB.  
 178 Due to our choice of sub-MDP reward  $r_l$ , the UCB includes a penalty on non-goal reachability.

**Lemma 1** (UCB implied by sub-MDP regret). *Let  $UB(\mathcal{R}^n(s, a))$  be an upper bound on sub-MDP  $M(s, a)$ 's cumulative regret after  $n$  rounds. Define  $\beta = (\kappa + H_l)2 \log(\frac{|\mathcal{C}(S, A)|H_h K}{\delta})$  and bonus,*

$$b_r^{s,a}(n) = \frac{UB(\mathcal{R}^n(s, a)) + \beta \sqrt{n}}{n} - \frac{\kappa}{n} \sum_{i=1}^n \mathbb{1}(s_{H_l}^{\pi_{s,a}^i} \neq g(s^h, a^h)).$$

179 *Then,  $\bar{r}_n(s, a) + b_r^{s,a}(n)$  is an UCB for  $r(\pi_{s,a}^*)$  with high probability.*

180 **High-level MDP transition stabilization:** An additional benefit of incentivizing goal-reachability is  
 181 that we know the idealized transition probability in the high-level MDP. As mentioned before, another  
 182 key difficulty with HRL is that the empirically estimated transitions in the high-level MDP drifts over  
 183 time. In our algorithm, the key stabilization approach is avoid estimation and set the transition in  
 184 the upper bound  $Q_i$  to be the idealized transition ( $g(s, a)$  w.p. 1). This allows us to prove our regret  
 185 guarantee as described below.

### 186 3.2 Regret Analysis of H-UCB-VI

187 We begin with a definition from [25] useful for comparing derived bounds.

188 **Definition 2** (Equivalent sub-MDPs [25]). *Two subMDPs  $M(s, a)$  and  $M(s', a')$  are equivalent if*  
 189 *there is a bijection  $\mathcal{F}$  between state space, and through  $\mathcal{F}$ , the subMDPs have the same transition*  
 190 *probabilities and rewards.*

191 Let there be  $\mathcal{C}(S, A^h)$  equivalent clusters. For instance, if there is no shared structure whatsoever,  
 192  $|\mathcal{C}(S, A^h)| = |S||A^h|$ . Now, we are ready to describe our main structural result.

193 **Theorem 1** (HRL regret minimization reduces to multi-task, sub-MDP regret minimization). *Let*  
 194  *$UB(\mathcal{R}^{N^{K,H_h}}(s, a))$  be an upper bound on sub-MDP  $M(s, a)$ 's cumulative regret over  $N^{K,H_h}(s, a)$*

visits:

$$\sum_{k=1}^K V_1^k(s_1) - V_1^{\pi^k}(s_1) \leq \tilde{O} \left( \sum_{s,a \in \mathcal{C}(S, A^h)} UB(\mathcal{R}^{N^{K, H_h}(s, a)}) + H^h H^l \sqrt{N^{K, H_h}(s, a)} \right) \quad (2)$$

196

*Proof Sketch.* We describe the key regret decomposition. After some manipulation, the regret may decompose into the following form,  $\sum_{k=1}^K V_1^k(s_1) - V_1^{\pi^k}(s_1) \leq \sum_{k=1}^K \sum_{h=1}^{H_h} \rho_h^k + \gamma_h^k + \sigma_h^k + \zeta_h^k$ , which may be parsed as follows.

$\rho_h^k = UB(r^{\pi^*}(s, a)) - r(\pi_{s_h^k, a_h^k}^{N^{k, h}})$  captures the regret due to sub-optimal intermediate return, the return of  $\pi_{s, a}^*$  versus the return of  $\pi_{s_h^k, a_h^k}$ .

$\gamma_h^k = (P_h - P^{\pi_{k, h}})V_{h+1}^{\pi^*}(s_h^k, a_h^k)$ ,  $\sigma_h^k = (P_h - P^{\pi_{k, h}})(V_{h+1}^k - V_{h+1}^{\pi^*})(s_h^k, a_h^k)$  captures the regret due to sub-optimal policies missing goal-reachability. Here  $P_h$  is the idealized transition (goal-reaching), while  $P^{\pi_{k, h}}$  is the transition induced by the current sub-policy.

$\zeta_h^k = P^{\pi_{k, h}}(V_{h+1}^k - V_{h+1}^{\pi_k})(s_h^k, a_h^k) - (V_{h+1}^k - V_{h+1}^{\pi_k})(s_{h+1}^k)$  is a martingale difference that concentrates via Azuma Hoeffding, and is dominated by the previous three sums.

Focusing on  $\sum_{h=1}^{H_h} \rho_h^k + \gamma_h^k + \sigma_h^k + \zeta_h^k$ , we observe that  $\gamma_h^k, \sigma_h^k \leq 2H_h H_l P^{\pi_{k, h}}(s_{h+1}^k \neq g(s_h^k, a_h^k))$ . The key remaining step is to recognize that  $\rho_h^k + \gamma_h^k + \sigma_h^k$  resembles the instantaneous regret in  $M(s_h^k, a_h^k)$ , and the result follows after some further bounding and rearrangement.

210

□

As in [25], it is natural to ask if the hierarchical Algorithm 1 also improves upon algorithms that do not leverage hierarchical structure. We make this comparison w.r.t vanilla UCB-VI under the same isomorphism assumption.

**Corollary 1.** Setting  $\mathcal{A}_{s, a}$  to be the standard UCB-VI algorithm with  $UB(\mathcal{R}^{N^{K, H_h}(s, a)}) = O(H_l^{3/2} \sqrt{|S_{s, a}^l| |A| N^{H_h, K}(s, a)})$ , we have the following bound:

$$\begin{aligned} & \sum_{s, a \in \mathcal{C}(S, A)} UB(\mathcal{R}^{N^{K, H_h}(s, a)}) + H^h H^l \sqrt{N^{K, H_h}(s, a)} \\ & \leq \tilde{O}(H_l^{3/2} \sqrt{\max_{s, a} |S_{s, a}^l| |A|} \sqrt{|\mathcal{C}(S, A^h)| (H_h K)} + H_h H_l \sqrt{|\mathcal{C}(S, A^h)| H_h K}) \end{aligned}$$

**Comparison with vanilla UCB-VI:** Standard application of UCB-VI yields the following rate:  $\tilde{O}((H_h H_l)^{3/2} \sqrt{|S_h| |S_l| |A| |K|})$ . H-UCB-VI compares favorably to vanilla UCB-VI, if  $\max_{s, a} |S_{s, a}^l| |\mathcal{C}(S, A^h)| \ll |S_h| |S_l|$ . Or in words, there is a lot of repeated/identical sub-MDPs and sub-MDPs have small state space size.

Furthermore, our bound is flexible in that one can choose more specialized learning algorithms  $\mathcal{A}_{c(s, a)}$  to leverage prior knowledge. For instance, if it is known that sub-MDPs are linear, one may choose to invoke multi-task RL algorithms that offer more refined rates for  $UB(\mathcal{R}^{N^{K, H_h}(s, a)})$  [11].

**Goal Selection:** An astute reader will note that the return of the learned hierarchical policy is close to  $V_1^*(s_1)$ , the return of the optimal hierarchical policy under goal function  $g$ . In other words, our learned policy is only as good as the goal function  $g$  we choose. One way to relax the assumption that we have a good goal function  $g$  is to assume we have access to multiple goal functions to choose from:  $g^1, \dots, g^n$ .

Then, an useful corollary of the sublinear H-UCB-VI regret bound,  $\frac{1}{K} [\sum_{k=1}^K V_1^{g^i, *}(s_1) - V_1^{g^i, \pi^k}(s_1)] \leq \tilde{O}(\sqrt{K})$ , is that it directly implies an UCB on  $V_1^{g^i, *}(s_1)$  (optimal return under goal  $g^i$ ). Hence, we may apply any UCB-based bandit algorithm on top of this to compete with the return of the best goal out of all the candidates  $\{g^j\}_{j \in [n]}$ .

## 4 Learning from Preference Feedback

In the previous section, we develop an algorithm to efficiently learn a hierarchical policy, purely from low-level, cardinal feedback. Now, we consider learning from ordinal (preferences) feedback. Our first observation is that the low-level feedback is no longer sufficient for learning a good policy.

**Proposition 1** (Non-identifiability of ranking among sub-MDP returns). *For any deterministic high-level policy learning algorithm with  $N_l$  samples of low-level feedback, there exists a MDP instance that induces regret constant in  $N_l$ .*

The intuition for this is simply that low-level, ordinal feedback can only identify rankings of low-level policies specific to a goal (sub-MDP), but not necessarily low level policies *across* differing goals. Thus, no matter how large the low-level sample-size  $N_l$ , the regret is non-vanishing in  $N_l$  and hence high-level feedback is needed to learn. Please see Appendix C for all proofs of results in this section.

### 4.1 Labeler Feedback and Consequences for Reward Modeling

The canonical approach to learning from preferences is reward modeling. Here, we consider the commonly studied linear reward setup [21, 20, 30, 29]. With known feature map  $\phi$  and unknown reward parameter  $\theta^*$ , preference feedback  $o_t$  follows the Bradley-Terry-Luce (BTL) model [6].

**Assumption 3.** *For trajectories  $\tau_1, \tau_2$ :  $\Pr(\tau_1 \succ \tau_2) = \sigma((\theta^*)^T(\phi(\tau_1) - \phi(\tau_2)))$ .*

When performing hierarchical learning, we encounter a conceptual challenge when learning from high-level feedback, which as we have shown before is necessary for learning.

**Conceptual Challenge: what can we assume the high-level labeler’s knowledge?** Consider a high level trajectory  $\tau_j = \{(s_i^j, a_i^j)\}_{i=1}^{H_h}$ .  $\phi(\tau_j) = \sum_{i \in [H_h]} \phi(s_i^j, a_i^j)$ ; the key difficulty is that sub-MDP feature expectation  $\phi(s_i^j, a_i^j)$  is dependent on the sub-policy deployed in  $M(s_i^j, a_i^j)$ . Thus, the high level labeler will have to have in mind some sub-policy  $\pi_{s,a}$ , when doing the comparison.

**Comparisons based on current sub-policy execution:** It is natural to first assume that the labeler envisions  $\phi(s_i^j, a_i^j) = \phi(\pi_{s_i^j, a_i^j}^t)$  at time  $t$ . In words, it is equivalent to asking: “How well does the high level policy do given *current execution* of sub-goals?”

*Current-feedback* of this form has the caveat that the labeler will have know about the performance of the current set of sub-policies  $\pi_{s,a}^t$  (potentially through AI-assisted means). This knowledge would have to be updated vary over time as  $\pi_{s,a}^t$ ’s update, which introduces a sizable cognitive load.

**Comparisons based on idealized sub-policy execution:** To reduce the cognitive load on the labeler, it is natural to fix the sub-policies used in the comparisons. A natural choice then is for the labeler to envision  $\phi(s_i^j, a_i^j) = \phi(\pi_{s_i^j, a_i^j}^*)$ . In words, it is equivalent to asking: “How well does the high level policy do given *perfect execution* of the sub-goals?” Instantiated in some examples, this would be: “how good is the essay if each argument is fleshed out perfectly” or “how good is the code if each helper function is implemented perfectly”.

*Idealized-feedback* of this form has the caveat that the high-level feedback will be a mis-match of how the current sub-policies actually execute. Although it has the advantage that the labeler is no longer required to (somehow) keep track of low-level sub-policies, thus reducing the cognitive load.

In what follows, we consider both types of feedback, showing that learning from idealized-feedback is possible. As we note, a drawback of idealized-feedback is that it is biased with respect to the realized features (since these are generated under current policies  $\pi_{s,a}^t$ ), while current-feedback is unbiased. We present an upper bound on the bias below.

**Lemma 2** (Bias of idealized-feedback). *Suppose there are  $N_h, N_l$  high, low-level trajectories, bias  $b$  is such that:  $\|b\|^2 = \sum_{t=1}^{N_h} |\langle \theta^*, \phi^{\pi^{N_l}}(\pi_1^i) - \phi^{\pi^{N_l}}(\pi_2^i) \rangle - \langle \theta^*, \phi^{\pi^*}(\pi_1^i) - \phi^{\pi^*}(\pi_2^i) \rangle|^2 = O(N_h/N_l)$ .*

**Proposition 2** (Reward model learning). *Let  $\theta_{MLE} = \arg \min_{\theta} \ell_D(\theta)$  and let  $C_b$  denote an upper bound on bias  $C_b \geq \|b\|$ , and  $\gamma, B$  constants. We have that with high probability:*

$$\|\theta^* - \theta_{MLE}\|_{\hat{\Sigma}_{N_h} + \lambda I} \leq C \sqrt{\frac{C_b \sqrt{N_h}}{\gamma^2} + \frac{C_b^2 + d + \log(1/\delta)}{\gamma^2}} + \lambda B^2$$

## 4.2 Hierarchical Preference Learning

We now construct a hierarchical, preference-learning algorithm that invokes REGIME, a contemporary preference-learning algorithm with provable guarantees, as sub-routine for sub-MDP learning [29].

**Sub-MDP reward learning:** To start, we again need to incentivize goal-reaching in the sub-MDP reward. As such, given original feature  $\phi_{orig}$ , we introduce an additional feature accounting for goal-reachability. For trajectory  $\tau$ , define  $\phi_i(s_i^\tau, a_i^\tau) = [\phi_{orig}(s_i^\tau, a_i^\tau), \mathbb{1}(i = H_l \wedge s_i^\tau = g(s, a))]$  and for policy  $\pi$ , feature expectation  $\phi_i(s_i^\pi, a_i^\pi) = [\phi_{orig}(s_i^\pi, a_i^\pi), \mathbb{1}(i = H_l) \Pr(s_{H_l}^\pi = g(s, a))]$ .

The corresponding reward vector will also change to become  $\theta^* = [\theta_{orig}^*, \kappa]$  for unknown  $\theta_{orig}^*, \kappa$ .

**Assumption 4.** *Through instructions to the labeler,  $\kappa$  may be raised beyond a threshold of our choosing.*

That is, we assume we can provide instructions to the labeler, emphasizing goal-reachability such that  $\kappa$  is higher than some given threshold. As before, we take the threshold to be  $\max(C, 2H_h H_l)$ . And so while  $\kappa$  is unknown, we know that  $\kappa \geq \max(C, 2H_h H_l)$ .

With this set up, we can then bound the regret due to sub-optimal sub-policies, and sub-optimal simulator  $P^{\epsilon'}$ , both of which are needed in the final regret analysis.

**Lemma 3** (Regret due to sub-optimal sub-policies). *For any high-level policy  $\pi$ , with high probability:*

$$\langle \phi^{\pi^*, P}(\pi) - \phi^{\pi^{N_l}, P}(\pi), \theta^* \rangle \leq H_h \left( \frac{C_1}{\sqrt{N_l}} + C_2 \epsilon' \right)$$

where this bound makes use of the REGIME guarantee on sub-MDP  $M(s, a)$  that  $|\langle \phi^P(\pi_{s,a}^*, \theta^*) - \phi^{P^{\epsilon'}}(\pi_{s,a}^{N_l}), \theta^* \rangle| \leq \frac{C_1}{\sqrt{N_l}} + C_2 \epsilon'$  [29].

**Lemma 4** (Regret due to sub-optimal simulator  $P^{\epsilon'}$ ). *Let  $\Phi^{\pi^{N_l}, P^{\epsilon'}}(\pi)$  denote the feature expectation under high level policy  $\pi$ , sub-MDP policies  $\pi^{N_l}$  and transitions  $P^{\epsilon'}$ . With high probability, for any high level policy  $\pi$ :*

$$|\langle \phi^{\pi^{N_l}, P}(\pi) - \phi^{\pi^{N_l}, P^{\epsilon'}}(\pi), \theta^* \rangle| \leq O((H_h d^2 + H_h^3 H_l^2) \epsilon' + \frac{H_h^2 H_l}{\kappa})$$

## 4.3 H-REGIME Analysis

Now, we present the H-REGIME Algorithm 2 with two remarks.

**Hierarchical Exploration:** A key aspect of experiment design in offline RL is ensuring sufficient coverage with exploration. The difficulty with coverage in the hierarchical setting is that at first glance, we may need to search for pairs of trajectories over  $(\pi_1, \{\pi_{s,a}^1\}), (\pi_1, \{\pi_{s,a}^2\}) \in (\Pi^h, \times_{s,a} \Pi_{s,a}^l)$ , instead of over  $\pi_1, \pi_2 \in \Pi^h$ . However, we show that in the goal-HRL case, we can fix the sub-policies to be  $\pi_{s,a}^{N_l}$  (for  $N_l$  large enough), and this is sufficient to compete with the optimal, hierarchical policy.

Additionally, unlike the tabular setting, sub-MDPs now share a common reward parameter  $\theta^*$ , thus allowing us to jointly (instead of separately as in tabular case) explore across sub-MDPs.

**Sufficiency of low-level feedback:** Through the algorithm, we can observe that low- and high-level exploration generates feature expectations set:  $\{\phi^{P^{\epsilon'}}(\pi_1) - \phi^{P^{\epsilon'}}(\pi_2) \mid \pi_1, \pi_2 \in \bigcup_{s,a} \Pi_{s,a}^l\}$  and  $\{\phi^{P^{\epsilon'}}(\pi_1) - \phi^{P^{\epsilon'}}(\pi_2) \mid \pi_1, \pi_2 \in \Pi^h, \pi_{s,a} = \pi_{s,a}^{N_l} \forall s, a\}$ . Therefore, when coverage of high level policy is subsumed by low-level features already (the latter is a subset of the former), it suffices to explore only using low-level feedback. As shown before in Proposition 2, it is not always sufficient. However, as we will see below, when it is sufficient, using low-level feedback leads to better rates.

**Theorem 2.** *With high probability, under  $N_h > 0$ :*

$$\begin{aligned} & V^{\pi^*, \pi^*} - V^{\hat{\pi}, \pi^{N_l}} \\ & \leq \langle \phi^{\pi^*, P}(\pi^*) - \phi^{\pi^{N_l}, P}(\pi^*), \theta^* \rangle + \frac{1}{\sqrt{N_h}} (2d \log(1 + \frac{N_h}{d})) \|\theta^* - \hat{\theta}\|_{\hat{\Sigma}_{N_h}^h} + \\ & |\langle \phi^{\pi^{N_l}, P}(\pi^*) - \phi^{\pi^{N_l}, P^{\epsilon'}}(\pi^*), \theta^* \rangle| + |\langle \phi^{\pi^{N_l}, P^{\epsilon'}}(\hat{\pi}) - \phi^{\pi^{N_l}, P}(\hat{\pi}), \theta^* \rangle| \end{aligned}$$



---

**Algorithm 2** Hierarchical-REGIME (H-REGIME)
 

---

- 1: **Initialize:** high-level policy class  $\Pi^h$ , low level-policy classes  $\Pi_{s,a}^l$ , simulator  $P^{\epsilon'}$  with  $\epsilon'$ -precision
  - 2: **for** episode  $n = 1, \dots, N_l$  **do**
  - 3:    $(\pi_1^n, \pi_2^n) \leftarrow \arg \max_{\pi_1, \pi_2 \in \bigcup_{s,a} \Pi_{s,a}^l} \|\phi^{P^{\epsilon'}}(\pi_1) - \phi^{P^{\epsilon'}}(\pi_2)\|_{(\hat{\Sigma}_n^l)^{-1}}$  ▷ *explore using policy feature expectation across sub-MDPs*
  - 4:    $\hat{\Sigma}_{n+1}^l = \hat{\Sigma}_n^l + (\phi^{P^{\epsilon'}}(\pi_1^n) - \phi^{P^{\epsilon'}}(\pi_2^n))(\phi^{P^{\epsilon'}}(\pi_1^n) - \phi^{P^{\epsilon'}}(\pi_2^n))^T$
  - 5: Collect trajectories  $\{\tau_1^i, \tau_2^i\}_{i=1}^{N_l}$  from environment and comparisons  $\{o_i\}_{i=1}^{N_l}$  ▷ *request comparison feedback for pairs of length- $H_l$  trajectories*
  - 6: Compute MLE  $\hat{\theta}^l$  from  $\{\tau_1^i, \tau_2^i\}_{i=1}^{N_l}$  and  $\{o_i\}_{i=1}^{N_l}$  ▷ *shared reward learning across sub-MDPs*
  - 7: Compute  $\pi_{s,a}^{N_l} = \arg \max_{\pi \in \Pi_{s,a}^l} \langle \phi^{P^{\epsilon'}}(\pi), \hat{\theta}^l \rangle$
  - 8: **for** episode  $n = 1, \dots, N_h$  **do**
  - 9:    $(\pi_1^n, \pi_2^n) \leftarrow \arg \max_{\pi_1, \pi_2 \in \Pi^h} \|\phi^{\pi^{N_l, P^{\epsilon'}}}(\pi_1) - \phi^{\pi^{N_l, P^{\epsilon'}}}(\pi_2)\|_{(\hat{\Sigma}_n^h)^{-1}}$  ▷ *high-level policy feature expectation generated using  $\pi_{s,a}^{N_l}$*
  - 10:    $\hat{\Sigma}_{n+1}^h = \hat{\Sigma}_n^h + (\phi^{\pi^{N_l, P^{\epsilon'}}}(\pi_1^n) - \phi^{\pi^{N_l, P^{\epsilon'}}}(\pi_2^n))(\phi^{\pi^{N_l, P^{\epsilon'}}}(\pi_1^n) - \phi^{\pi^{N_l, P^{\epsilon'}}}(\pi_2^n))^T$
  - 11:   Obtain  $(\tau_1^n, \tau_2^n)$  from running  $(\pi_1^n, \pi_2^n)$  and comparison  $o_n$
  - 12: Collect trajectories  $\{\tau_1^i, \tau_2^i\}_{i=1}^{N_h}$  from environment and comparisons  $\{o_i\}_{i=1}^{N_h}$  ▷ *request comparison feedback for pairs of length- $H_l$  trajectories*
  - 13: Compute MLE  $\hat{\theta}^h$  from  $\{\tau_1^i, \tau_2^i\}_{i=1}^{N_h}$  and  $\{o_i\}_{i=1}^{N_h}$
  - 14: **return** high-level policy  $\hat{\pi} = \arg \max_{\pi \in \Pi^h} \langle \phi^{\pi^{N_l, P^{\epsilon'}}}(\pi), \hat{\theta}^h \rangle$ , low-level policies  $\{\pi_{s,a}^{N_l}\}_{s,a \in \mathcal{C}(S, A^h)}$
- 

310 To parse this, the regret decomposes into four terms. The first term is the regret due to sub-optimality  
 311 in low-level policies  $\pi^{N_l}$ . The remaining three terms are derived from sub-optimality due to high-level  
 312 policy  $\hat{\pi}$ , decomposing into the second term on regret due to bias in learned reward  $\hat{\theta}$ , the third and  
 313 fourth term on regret due to sub-optimality of simulator  $P^{\epsilon'}$ .

314 **Corollary 2.** *Using Theorem 2, we obtain the following rates in terms of data tradeoffs:*

315 **Idealized-feedback and required high-/low-level feedback:** *the overall rate comes out to  $O(N_l^{-1/4} +$   
 316  $N_h^{-1/2})$ . While high level trajectories provide additional coverage, it also incurs bias linear in  $N_h$  of  
 317 the bias of the low-level trajectories, thus slowing down the rate (Lemma 2).*

318 **Current-feedback and required high-/low-level feedback:** *the overall rate comes out to  $O(N_l^{-1/2} +$   
 319  $N_h^{-1/2})$ . The current-feedback is unbiased and results in more efficient reward learning with  
 320  $\|\theta^* - \hat{\theta}\|_{\hat{\Sigma}_{N_h}^h} = O(1)$  [29].*

321 **Only low-level feedback is required due to sufficiency in coverage:** *the overall rate comes out to  
 322  $O(N_l^{-1/2})$ . In a nutshell, this is because we can explore with just  $N_l$  low-level samples which is  
 323 unbiased, resulting in  $\|\theta^* - \hat{\theta}\|_{\hat{\Sigma}_{N_l}^l} = O(1)$ . Hence, both exploration and reward learning is efficient.*

## 324 5 Discussion

325 Our work considers scalable oversight in the context of goal-conditioned HRL, in which we show  
 326 that one can efficiently use hierarchical structure to learn from bounded human feedback.

327 **Limitations & Future Work:** In goal-conditioned HRL, our regret guarantees are with respect to  
 328 the return of the optimal, hierarchical policy, whose performance is dependent on the usefulness  
 329 of goal function  $g$ . Further research is needed to understand on how to learn good goal functions,  
 330 using limited supervised or unsupervised learning. Additionally, under current-feedback, the labeler  
 331 providing high-level feedback is somehow made aware of sub-policy performance. An exciting  
 332 research direction is how one may provide such knowledge through AI-assistance.

## References

- [1] AP English Literature Scoring Rubrics. <https://apcentral.collegeboard.org/media/pdf/ap-english-literature-and-composition-frqs-1-2-3-scoring-rubrics.pdf>. Accessed: 2024-05-15.
- [2] Dario Amodei, Chris Olah, Jacob Steinhardt, Paul Christiano, John Schulman, and Dan Mané. Concrete problems in ai safety. *arXiv preprint arXiv:1606.06565*, 2016.
- [3] Mohammad Gheshlaghi Azar, Ian Osband, and Rémi Munos. Minimax regret bounds for reinforcement learning. In *International conference on machine learning*, pages 263–272. PMLR, 2017.
- [4] Yuntao Bai, Andy Jones, Kamal Ndousse, Amanda Askell, Anna Chen, Nova DasSarma, Dawn Drain, Stanislav Fort, Deep Ganguli, Tom Henighan, et al. Training a helpful and harmless assistant with reinforcement learning from human feedback. *arXiv preprint arXiv:2204.05862*, 2022.
- [5] Samuel R Bowman, Jeeyoon Hyun, Ethan Perez, Edwin Chen, Craig Pettit, Scott Heiner, Kamilė Lukošūūtė, Amanda Askell, Andy Jones, Anna Chen, et al. Measuring progress on scalable oversight for large language models. *arXiv preprint arXiv:2211.03540*, 2022.
- [6] Ralph Allan Bradley and Milton E Terry. Rank analysis of incomplete block designs: I. the method of paired comparisons. *Biometrika*, 39(3/4):324–345, 1952.
- [7] Elliot Chane-Sane, Cordelia Schmid, and Ivan Laptev. Goal-conditioned reinforcement learning with imagined subgoals. In *International Conference on Machine Learning*, pages 1430–1440. PMLR, 2021.
- [8] Paul Christiano, Buck Shlegeris, and Dario Amodei. Supervising strong learners by amplifying weak experts. *arXiv preprint arXiv:1810.08575*, 2018.
- [9] Paul F Christiano, Jan Leike, Tom Brown, Miljan Martic, Shane Legg, and Dario Amodei. Deep reinforcement learning from human preferences. *Advances in neural information processing systems*, 30, 2017.
- [10] Danijar Hafner, Kuang-Huei Lee, Ian Fischer, and Pieter Abbeel. Deep hierarchical planning from pixels. *Advances in Neural Information Processing Systems*, 35:26091–26104, 2022.
- [11] Jiachen Hu, Xiaoyu Chen, Chi Jin, Lihong Li, and Liwei Wang. Near-optimal representation learning for linear bandits and linear rl. In *International Conference on Machine Learning*, pages 4349–4358. PMLR, 2021.
- [12] Evan Hubinger. Ai safety via market making. <https://www.alignmentforum.org/posts/YWwzccGbcHMJMpT45/ai-safety-via-market-making>. Accessed: 2024-05-15.
- [13] Geoffrey Irving, Paul Christiano, and Dario Amodei. Ai safety via debate. *arXiv preprint arXiv:1805.00899*, 2018.
- [14] Kimin Lee, Laura Smith, and Pieter Abbeel. Pebble: Feedback-efficient interactive reinforcement learning via relabeling experience and unsupervised pre-training. *arXiv preprint arXiv:2106.05091*, 2021.
- [15] Jan Leike, David Krueger, Tom Everitt, Miljan Martic, Vishal Maini, and Shane Legg. Scalable agent alignment via reward modeling: a research direction. *arXiv preprint arXiv:1811.07871*, 2018.
- [16] Andrew Levy, George Konidaris, Robert Platt, and Kate Saenko. Learning multi-level hierarchies with hindsight. *arXiv preprint arXiv:1712.00948*, 2017.
- [17] Ofir Nachum, Shixiang Shane Gu, Honglak Lee, and Sergey Levine. Data-efficient hierarchical reinforcement learning. *Advances in neural information processing systems*, 31, 2018.

- [18] Ellen Novoseller, Yibing Wei, Yanan Sui, Yisong Yue, and Joel Burdick. Dueling posterior sampling for preference-based reinforcement learning. In *Conference on Uncertainty in Artificial Intelligence*, pages 1029–1038. PMLR, 2020.
- [19] Long Ouyang, Jeffrey Wu, Xu Jiang, Diogo Almeida, Carroll Wainwright, Pamela Mishkin, Chong Zhang, Sandhini Agarwal, Katarina Slama, Alex Ray, et al. Training language models to follow instructions with human feedback. *Advances in Neural Information Processing Systems*, 35:27730–27744, 2022.
- [20] Aldo Pacchiano, Aadirupa Saha, and Jonathan Lee. Dueling rl: reinforcement learning with trajectory preferences. *arXiv preprint arXiv:2111.04850*, 2021.
- [21] Jack Parker-Holder, Aldo Pacchiano, Krzysztof M Choromanski, and Stephen J Roberts. Effective diversity in population based reinforcement learning. *Advances in Neural Information Processing Systems*, 33:18050–18062, 2020.
- [22] Arnaud Robert, Ciara Pike-Burke, and Aldo A Faisal. Sample complexity of goal-conditioned hierarchical reinforcement learning. In *Thirty-seventh Conference on Neural Information Processing Systems*, 2023.
- [23] William Saunders, Catherine Yeh, Jeff Wu, Steven Bills, Long Ouyang, Jonathan Ward, and Jan Leike. Self-critiquing models for assisting human evaluators. *arXiv preprint arXiv:2206.05802*, 2022.
- [24] Nisan Stiennon, Long Ouyang, Jeffrey Wu, Daniel Ziegler, Ryan Lowe, Chelsea Voss, Alec Radford, Dario Amodei, and Paul F Christiano. Learning to summarize with human feedback. *Advances in Neural Information Processing Systems*, 33:3008–3021, 2020.
- [25] Zheng Wen, Doina Precup, Morteza Ibrahimi, Andre Barreto, Benjamin Van Roy, and Satinder Singh. On efficiency in hierarchical reinforcement learning. *Advances in Neural Information Processing Systems*, 33:6708–6718, 2020.
- [26] Christian Wirth, Riad Akrou, Gerhard Neumann, and Johannes Fürnkranz. A survey of preference-based reinforcement learning methods. *Journal of Machine Learning Research*, 18(136):1–46, 2017.
- [27] Jeff Wu, Long Ouyang, Daniel M Ziegler, Nisan Stiennon, Ryan Lowe, Jan Leike, and Paul Christiano. Recursively summarizing books with human feedback. *arXiv preprint arXiv:2109.10862*, 2021.
- [28] Yichong Xu, Ruosong Wang, Lin Yang, Aarti Singh, and Artur Dubrawski. Preference-based reinforcement learning with finite-time guarantees. *Advances in Neural Information Processing Systems*, 33:18784–18794, 2020.
- [29] Wenhao Zhan, Masatoshi Uehara, Nathan Kallus, Jason D Lee, and Wen Sun. Provable offline reinforcement learning with human feedback. *arXiv preprint arXiv:2305.14816*, 2023.
- [30] Banghua Zhu, Jiantao Jiao, and Michael I Jordan. Principled reinforcement learning with human feedback from pairwise or  $k$ -wise comparisons. *arXiv preprint arXiv:2301.11270*, 2023.
- [31] Daniel M Ziegler, Nisan Stiennon, Jeffrey Wu, Tom B Brown, Alec Radford, Dario Amodei, Paul Christiano, and Geoffrey Irving. Fine-tuning language models from human preferences. *arXiv preprint arXiv:1909.08593*, 2019.

## 418 A More Related Works

419 **Scalable Oversight:** Scalable oversight is a nascent but important topic in the area of AI alignment [2,  
420 8, 15, 5], wherein the goal is to boost the labeler’s ability to provide feedback to complex models.  
421 Proposed approaches include (recursive) self-critique, summarization, debate, plain model Interaction  
422 and market-making, all of which aim to have the model (or auxiliary models) generate interpretable  
423 and/or lower-dimensional forms of outputs for the human to parse [15, 13, 24, 27, 23, 5, 12]. Our  
424 work studies how one may leverage hierarchical structure as one approach to scaling up feedback.

425 **Goal-conditioned RL:** Further afield, there has been a lot of work demonstrating the promise/success  
426 of goal-conditioned RL with examples from the likes of [16, 17, 7, 10]. The sub-MDP reward is  
427 often set to incentivize *only* goal state reachability, as oftentimes the MDP of interest has sparse  
428 rewards, making intermediate returns zero. In our setting, rewards need not be sparse, thus bringing  
429 into consideration the tradeoff between intermediate return and goal-reachability. This work initiates  
430 the study of scalable oversight in goal-oriented HRL, and owing to the success of goal-oriented HRL  
431 in practice, it is our hope that it can be stepping stone towards developing practical scalable oversight  
432 techniques.

| Notation               |                                                                                                                            |
|------------------------|----------------------------------------------------------------------------------------------------------------------------|
| $M(s, a)$              | sub-MDP at state $s$ with high level action $a$                                                                            |
| $\pi_{s,a}^i$          | policy used by sub-MDP $M(s, a)$ 's no-regret algorithm during the $i$ -th visit                                           |
| $\pi_{s,a}^*$          | optimal policy in sub-MDP $M(s, a)$                                                                                        |
| $r(\pi_{s,a}^i)$       | expected reward of policy $\pi_{s,a}^i$ in sub-MDP $M(s, a)$                                                               |
| $r_{l,h}$              | sub-MDP reward definition.                                                                                                 |
| $\hat{r}(\pi_{s,a}^i)$ | observed reward of policy $\pi$ in sub-MDP $M(s, a)$                                                                       |
| $\bar{r}_n(s, a)$      | average observed policy reward $\bar{r}_n(s, a) = \frac{1}{n} \sum_{i=1}^n \hat{r}(\pi_{s,a}^i)$                           |
| $\mathcal{R}^n(s, a)$  | sub-MDP $M(s, a)$ cumulative regret across $n$ steps, $\mathcal{R}^n(s, a) = \sum_{i=1}^n r(\pi_{s,a}^*) - r(\pi_{s,a}^i)$ |
| $N^{k,h}(s, a)$        | number of times $M(s, a)$ has been visited up until episode $k$ , horizon $h$                                              |
| $P^\pi(\cdot   s, a)$  | distribution over states of policy $\pi$ after going through subMDP $M(s, a)$                                              |
| $\psi_n$               | a factor such that $\psi_n = \tilde{O}(\sqrt{n})$ , where the $\tilde{O}$ omits up to log dependence on $K$                |

Table 1: Table of notation used in this section.

## B Proofs for Section 3

### B.1 Sub-MDP Bonus Construction

**Sub-MDP Reward Definition:** Define the reward in sub-MDP  $M(s, a)$  at time step  $h$  to be:

$$r_{l,h}(s', a') = r(s', a') + \kappa \mathbb{1}(h = H_l \wedge s' = g(s, a)).$$

Firstly, since by definition  $\pi_{s,a}^* \in \arg \max_{\pi \in \Pi_{s,a}} r(\pi) + C \cdot \Pr(s_{H_l}^\pi = g(s, a))$ , we have that

$$\pi_{s,a}^* \in \arg \max_{\pi \in \Pi_{s,a}} r(\pi) + \kappa \cdot \Pr(s_{H_l}^\pi = g(s, a)).$$

Indeed,

$$\begin{aligned} & r(\pi_{s,a}^*) + \kappa \Pr(s_{H_l}^{\pi_{s,a}^*} = g(s, a)) \\ &= [r(\pi_{s,a}^*) + C \cdot \Pr(s_{H_l}^{\pi_{s,a}^*} = g(s, a))] + (\kappa - C) \Pr(s_{H_l}^{\pi_{s,a}^*} = g(s, a)) \\ &\geq [r(\pi) + C \cdot \Pr(s_{H_l}^\pi = g(s, a))] + (\kappa - C) \Pr(s_{H_l}^\pi = g(s, a)) \\ &\quad (\Pr(s_{H_l}^{\pi_{s,a}^*} = g(s, a)) = 1 \geq \Pr(s_{H_l}^\pi = g(s, a)) \forall \pi) \end{aligned}$$

Secondly, using the definition of  $r_l$ , we have that:

$$r_l(\pi_{s,a}^*) - r_l(\pi_{s,a}^i) = r(\pi_{s,a}^*) + \kappa P(s_{H_l}^{\pi_{s,a}^*} = g(s, a)) - r(\pi_{s,a}^i) - \kappa P(s_{H_l}^{\pi_{s,a}^i} = g(s, a))$$

By the reachability assumption,  $P(s_{H_l}^{\pi_{s,a}^*} = g(s, a)) = 1$ , this implies that

$$r_l(\pi_{s,a}^*) - r_l(\pi_{s,a}^i) = r(\pi_{s,a}^*) - r(\pi_{s,a}^i) + \kappa P(s_{H_l}^{\pi_{s,a}^i} \neq g(s, a))$$

Therefore, summing this across  $n$  visits to  $M(s, a)$ , we have:

$$\begin{aligned} & \mathcal{R}^n(s, a) \\ &= \sum_{i=1}^n r_l(\pi_{s,a}^*) - r_l(\pi_{s,a}^i) \\ &= \sum_{i=1}^n r(\pi_{s,a}^*) - r(\pi_{s,a}^i) + \kappa \sum_{i=1}^n P(s_{H_l}^{\pi_{s,a}^i} \neq g(s, a)) \end{aligned}$$

This statement is useful because we can compute an UCB on  $\sum_{i=1}^n r(\pi_{s,a}^*)$  and, implicitly, a LCB on  $\sum_{i=1}^n r(\pi_{s,a}^i)$  (provided we do not bound  $\mathcal{R}^n(s, a)$ ).

445 **Lemma 5** (Bonus with “penalty” for non-reachability). *Let  $UB(\mathcal{R}^n(s, a))$  be any upper bound on*  
 446 *the sub-MDP regret, then if we define:*

$$b_r^{s,a}(n) = \frac{UB(\mathcal{R}^n(s, a)) + (\kappa + H_l)2 \log(\frac{|\mathcal{C}(S, A^h)|H_h K}{\delta})\sqrt{n}}{n} - \frac{\kappa}{n} \sum_{i=1}^n \mathbb{1}(s_{H_l}^{\pi_{s,a}^i} \neq g(s, a))$$

447 Then,  $\bar{r}_n(s, a) + b_r^{s,a}(n)$  is an UCB for  $r(\pi_{s,a}^*)$  with probability  $\geq 1 - \frac{\delta}{3|\mathcal{C}(S, A^h)|H_h K}$ .

448 Let the event that the above holds be  $\mathcal{E}_{s,a}^n$ .

*Proof.*

$$\begin{aligned} & \sum_{i=1}^n r(\pi_{s,a}^*) \\ &= \mathcal{R}^n(s, a) - \kappa \sum_{i=1}^n P(s_{H_l}^{\pi_{s,a}^i} \neq g(s, a)) + \sum_{i=1}^n r(\pi_{s,a}^i) \\ &\leq \mathcal{R}^n(s, a) - \kappa \left( \sum_{i=1}^n \mathbb{1}(s_{H_l}^{\pi_{s,a}^i} \neq g(s, a)) - \psi_n \right) + \sum_{i=1}^n r(\pi_{s,a}^i) \quad (\diamond) \\ &= \mathcal{R}^n(s, a) - \kappa \sum_{i=1}^n \mathbb{1}(s_{H_l}^{\pi_{s,a}^i} \neq g(s, a)) + \kappa \psi_n + \sum_{i=1}^n \hat{r}(\pi_{s,a}^i) + \left( \sum_{i=1}^n r(\pi_{s,a}^i) - \sum_{i=1}^n \hat{r}(\pi_{s,a}^i) \right) \\ &\leq UB(\mathcal{R}^n(s, a)) + (\kappa + H_l)\psi_n - \kappa \sum_{i=1}^n \mathbb{1}(s_{H_l}^{\pi_{s,a}^i} \neq g(s, a)) + \sum_{i=1}^n \hat{r}(\pi_{s,a}^i) \quad (\kappa' = \kappa + H_l) \end{aligned}$$

449  $(\diamond)$  : Here we use two applications of Azuma-Hoeffding:

450 • With probability higher than  $1 - \delta$ :

$$\left| \sum_{i=1}^n P(s_{H_l}^{\pi_{s,a}^i} \neq g(s, a)) - \sum_{i=1}^n \mathbb{1}(s_{H_l}^{\pi_{s,a}^i} \neq g(s, a)) \right| \leq \psi_n = 2\sqrt{n}$$

451 We have that  $\mathbb{E}[P(s_{H_l}^{\pi_{s,a}^i} \neq g(s, a)) - \mathbb{1}(s_{H_l}^{\pi_{s,a}^i} \neq g(s, a)) | \mathcal{F}_{i-1}] = 0$ .

452 This is true because  $P(s_{H_l}^{\pi_{s,a}^i} \neq g(s, a))$  and  $\mathbb{1}(s_{H_l}^{\pi_{s,a}^i} \neq g(s, a))$  are a function of only the  
 453 transition probability of the MDP at the  $i$ th step conditioned on  $\mathcal{F}_{i-1}$ . Thus,  $P(s_{H_l}^{\pi_{s,a}^i} \neq$   
 454  $g(s, a)) - \mathbb{1}(s_{H_l}^{\pi_{s,a}^i} \neq g(s, a))$  is a martingale difference. And we can use Azuma-Hoeffding.

455 • With probability higher than  $1 - \delta$ :

$$\left| \sum_{i=1}^n r(\pi_{s,a}^i) - \sum_{i=1}^n \hat{r}(\pi_{s,a}^i) \right| \leq H_l \psi_n \leq H_l 2\sqrt{n}$$

456 This again follows from Azuma-Hoeffding on martingale difference  $r(\pi_{s,a}^i) - \hat{r}(\pi_{s,a}^i)$ , as  
 457  $\mathbb{E}[r(\pi_{s,a}^i) - \hat{r}(\pi_{s,a}^i) | \mathcal{F}_{i-1}] = 0$ . And  $|r(\pi_{s,a}^i) - \hat{r}(\pi_{s,a}^i)| \leq H_l$ .

458 Thus,

$$r(\pi_{s,a}^*) \leq \frac{1}{n} \sum_{i=1}^n \hat{r}(\pi_{s,a}^i) + b_r^{s,a}(n) \Rightarrow r(\pi_{s,a}^*) - \bar{r}_n(s, a) \leq b_r^{s,a}(n)$$

459

□

460 **Remark 1.** One choice for  $UB(\mathcal{R}^n(s, a)) = H_l^{3/2} \sqrt{|S_{s,a}^l| |A| n}$  if we let  $\mathcal{A}_{s,a}$  be the standard  
 461 UCB-VI algorithm [3].

## 462 B.2 Optimism Lemma

**Lemma 6** (Optimism). Let  $V_h^k$  be the  $V$  value as in Algorithm 1 at episode  $k$ . Let  $\pi^*$  be the optimal hierarchical policy. For a fixed  $k$  and  $h$ , if  $\forall s, a, n$ ,  $\mathcal{E}_{s,a}^n$  holds:

$$V_h^k(s) \geq V_h^{\pi^*}(s) \quad \forall s$$

463

464 *Proof.* Fix some episode  $k$ . We will prove this lemma via induction on  $h = H_h + 1, \dots, 1$ .

465 **Base case:** At  $h = H_h + 1$ ,  $V_h^k(s) \geq 0 = V_h^{\pi^*}(s)$  for all  $s$ .

466 **Induction Step:** Suppose this is true up until  $h = H_h + 1, \dots, h' + 1$ . Now at time step  $h'$  and  
 467 any  $s, a$ .

468 Firstly, if  $Q_{h'}^k(s, a) = H_h H_l$  (e.g. if  $s, a \notin \mathcal{D}^k$ ), then  $Q_{h'}^k(s, a) \geq Q_{h'}^*(s, a)$ . Otherwise,  
 469  $Q_{h'}^k(s, a) < H_h H_l$  and we have that:

$$\begin{aligned} Q_{h'}^k(s, a) - Q_{h'}^*(s, a) &= [\bar{r}_{N^{k,h}(s,a)}(s, a) + b_r^{s,a}(N^{k,h}(s, a)) + V_{h'+1}^k(g(s, a))] - (r(\pi_{s,a}^*) + P_{h'} V_{h'+1}^{\pi^*}(s, a)) \\ &\quad (Q_{h'}^k \text{ definition as in Equation 1}) \\ &\geq V_{h'+1}^k(g(s, a)) - P_{h'} V_{h'+1}^{\pi^*}(s, a) \\ &\quad (\bar{r}_{N^{k,h}(s,a)}(s, a) + b_r^{s,a}(N^{k,h}(s, a)) \text{ is an UCB of } r(\pi_{s,a}^*)) \\ &= V_{h'+1}^k(g(s, a)) - V_{h'+1}^{\pi^*}(g(s, a)) \\ &\quad (\pi_{s,a}^* \text{ reaches goal state w.p 1, so } P_{h'}(g(s, a)|s, a) = 1) \\ &\geq 0 \quad (\text{induction hypothesis}) \end{aligned}$$

470 Thus,  $V_{h'}^k(s) = \max_a Q_{h'}^k(s, a) \geq \max_a Q_{h'}^*(s, a) = V_{h'}^{\pi^*}(s)$ .

471

□

**Corollary 3.**

$$\sum_{k=1}^K V_1^{\pi^*}(s_1) - V_1^{\pi^k}(s_1) \leq \sum_{k=1}^K V_1^k(s_1) - V_1^{\pi^k}(s_1)$$

## 472 B.3 Supporting results needed for regret analysis

**Proposition 3.**

$$\sum_{k=1}^K V_1^k(s_1) - V_1^{\pi^k}(s_1) \leq \sum_{k=1}^K \sum_{h=1}^{H_h} \zeta_h^k + \gamma_h^k + \sigma_h^k + \rho_h^k \quad (3)$$

473 *Proof.* For any  $k$  and  $h$ , we consider bounding  $V_h^k(s_h^k) - V_h^{\pi^k}(s_h^k)$ , which is equal to:

$$\begin{aligned} V_h^k(s_h^k) - V_h^{\pi^k}(s_h^k) &= (Q_h^k - Q_h^{\pi^k})(s_h^k, a_h^k) \\ &\leq (\bar{r}_{N^{k,h}(s_h^k, a_h^k)}(s_h^k, a_h^k) + b_r^{s_h^k, a_h^k}(N^{k,h}(s_h^k, a_h^k))) - r(\pi_{s_h^k, a_h^k}^{N^{k,h}(s_h^k, a_h^k)}) \\ &\quad + V_{h+1}^k(g(s_h^k, a_h^k)) - P^{\pi^k, h} V_{h+1}^{\pi^k}(s_h^k, a_h^k) \quad (\text{due to the min}) \\ &= \rho_h^k + [V_{h+1}^k(g(s_h^k, a_h^k)) - P^{\pi^k, h} V_{h+1}^{\pi^k}(s_h^k, a_h^k)] \end{aligned}$$

474 where we set  $\rho_h^k = \bar{r}_{N^{k,h}(s_h^k, a_h^k)}(s_h^k, a_h^k) + b_r^{s_h^k, a_h^k}(N^{k,h}(s_h^k, a_h^k)) - r(\pi_{s_h^k, a_h^k}^{N^{k,h}(s_h^k, a_h^k)})$ .

475 Continuing with the original proof and focusing on the second term:

$$\begin{aligned}
& V_{h+1}^k(g(s_h^k, a_h^k)) - P^{\pi_{k,h}} V_{h+1}^{\pi_k}(s_h^k, a_h^k) \\
&= V_{h+1}^k(g(s_h^k, a_h^k)) - P^{\pi_{k,h}} V_{h+1}^k(s_h^k, a_h^k) + P^{\pi_{k,h}}(V_{h+1}^k - V_{h+1}^{\pi_k})(s_h^k, a_h^k) \\
&= (P_h - P^{\pi_{k,h}})V_{h+1}^k(s_h^k, a_h^k) + P^{\pi_{k,h}}(V_{h+1}^k - V_{h+1}^{\pi_k})(s_h^k, a_h^k) \\
& \quad (P^h \text{ is the transition under optimal sub MDP policy so it takes } s_h^k, a_h^k \text{ to } g(s_h^k, a_h^k) \text{ deterministically}) \\
&= (P_h - P^{\pi_{k,h}})V_{h+1}^{\pi^*}(s_h^k, a_h^k) + (P_h - P^{\pi_{k,h}})(V_{h+1}^k - V_{h+1}^{\pi^*})(s_h^k, a_h^k) + P^{\pi_{k,h}}(V_{h+1}^k - V_{h+1}^{\pi_k})(s_h^k, a_h^k) \\
&= \gamma_h^k + \sigma_h^k + P^{\pi_{k,h}}(V_{h+1}^k - V_{h+1}^{\pi_k})(s_h^k, a_h^k)
\end{aligned}$$

476 where

$$\begin{aligned}
477 \quad & \bullet \gamma_h^k = (P_h - P^{\pi_{k,h}})V_{h+1}^{\pi^*}(s_h^k, a_h^k) \\
478 \quad & \bullet \sigma_h^k = (P_h - P^{\pi_{k,h}})(V_{h+1}^k - V_{h+1}^{\pi^*})(s_h^k, a_h^k)
\end{aligned}$$

479 In summary,

$$\begin{aligned}
& V_h^k(s_h^k) - V_h^{\pi_k}(s_h^k) \\
& \leq \rho_h^k + \gamma_h^k + \sigma_h^k + P^{\pi_{k,h}}(V_{h+1}^k - V_{h+1}^{\pi_k})(s_h^k, a_h^k) \\
& = (V_{h+1}^k - V_{h+1}^{\pi_k})(s_{h+1}^k) + \zeta_h^k + \gamma_h^k + \sigma_h^k + \rho_h^k,
\end{aligned}$$

480 where we introduce the notation  $\zeta_h^k = P^{\pi_{k,h}}(V_{h+1}^k - V_{h+1}^{\pi_k})(s_h^k, a_h^k) - (V_{h+1}^k - V_{h+1}^{\pi_k})(s_{h+1}^k)$ .

481 Unrolling the recursion starting at  $h = 1$ :

$$\begin{aligned}
& V_1^k(s_h^k) - V_1^{\pi_k}(s_h^k) \\
& \leq 1(\zeta_h^k + \gamma_h^k + \sigma_h^k + \rho_h^k) + \dots + (1)^{H_h}(\zeta_{H_h}^k + \gamma_{H_h}^k + \sigma_{H_h}^k + \rho_{H_h}^k) \\
& = 1 \cdot \left( \sum_{h=1}^{H_h} \zeta_h^k + \gamma_h^k + \sigma_h^k + \rho_h^k \right)
\end{aligned}$$

482 Summing across  $k \in [K]$ , it suffices to bound:

$$\sum_{k=1}^K V_1^k(s_1) - V_1^{\pi^k}(s_1) \leq \sum_{k=1}^K \sum_{h=1}^{H_h} \zeta_h^k + \gamma_h^k + \sigma_h^k + \rho_h^k \quad (4)$$

483

□

484 **Remark 2.** *There are two sources of sub-optimality in the bound.*

485 *One is the sub-optimality while executing the sub-MDP policies. This is covered by the per-step high*  
486 *level reward bonus (which is also the UCB on the return of the sub-MDP's return) in  $\rho_h^k$ .*

487 *The other is the sub-optimality of not landing on  $g(s_h^k, a_h^k)$ , there is covered by  $\gamma_h^k, \sigma_h^k$ , which affects*  
488 *future reward. The martingale difference  $\zeta_h^k$  is zero in expectation, so it is not some measure of*  
489 *suboptimality.*

490 We first bound the  $\zeta$ 's, whose sum is dominated by  $\sum_{k=1}^K \sum_{h=1}^{H_h} \rho_h^k + \gamma_h^k + \sigma_h^k$ .



491 **Lemma 7.** *With probability  $\geq 1 - \delta/3$ :*

$$\sum_{k=1}^K \sum_{h=1}^{H_h} \zeta_h^k \leq \tilde{O}(H^h H^l \sqrt{H^h K})$$

492 *Let the event that the above inequality hold be  $\mathcal{E}^\zeta$ .*

493 *Proof.* The concentration of  $\zeta_h^k$  follows from Azuma Hoeffding, as the following is a martingale  
494 difference.

$$\zeta_h^k = P^{\pi_{k,h}}(V_{h+1}^k - V_{h+1}^{\pi_k})(s_h^k, a_h^k) - (V_{h+1}^k - V_{h+1}^{\pi_k})(s_{h+1}^k)$$

495 with  $\mathbb{E}[\zeta_h^k | F_{k,h}] = 0$ , since the expectation is only wrt randomness in  $s_{h+1}^k$ . Moreover, this martingale  
496 difference is bounded by  $4H^h H^l$

497 □

498 Next, we simplify the sum of remaining terms.

499 **Lemma 8.** *We have that:*

$$\sum_{k=1}^K \sum_{h=1}^{H_h} \gamma_h^k \leq H^h H^l \sum_{k=1}^K \sum_{h=1}^{H_h} P^{\pi_{k,h}}(s_{h+1}^k \neq g(s_h^k, a_h^k))$$

500 *and*

$$\sum_{k=1}^K \sum_{h=1}^{H_h} \sigma_h^k \leq H^h H^l \sum_{k=1}^K \sum_{h=1}^{H_h} P^{\pi_{k,h}}(s_{h+1}^k \neq g(s_h^k, a_h^k))$$

*Proof.*

$$\begin{aligned} & \sum_{k=1}^K \sum_{h=1}^{H_h} \gamma_h^k \\ &= \sum_{k=1}^K \sum_{h=1}^{H_h} (P_h - P^{\pi_{k,h}}) V_{h+1}^{\pi_k^*}(s_h^k, a_h^k) \\ &= \sum_{k=1}^K \sum_{h=1}^{H_h} P^{\pi_{k,h}}(s_{h+1}^k \neq g(s_h^k, a_h^k)) (V_{h+1}^{\pi_k^*}(g(s_h^k, a_h^k)) - V_{h+1}^{\pi_k^*}(s_{h+1}^k)) \\ &\leq H^h H^l \sum_{k=1}^K \sum_{h=1}^{H_h} P^{\pi_{k,h}}(s_{h+1}^k \neq g(s_h^k, a_h^k)) \end{aligned}$$

501 Similarly,

$$\begin{aligned}
& \sum_{k=1}^K \sum_{h=1}^{H_h} \sigma_h^k \\
&= \sum_{k=1}^K \sum_{h=1}^{H_h} (P_h - P^{\pi_{k,h}})(V_{h+1}^k - V_{h+1}^{\pi^*})(s_h^k, a_h^k) \\
&= \sum_{k=1}^K \sum_{h=1}^{H_h} P^{\pi_{k,h}}(s_{h+1}^k \neq g(s_h^k, a_h^k))[(V_{h+1}^k - V_{h+1}^{\pi^*})(g(s_h^k, a_h^k)) - (V_{h+1}^k - V_{h+1}^{\pi^*})(s_{h+1}^k)] \\
&\leq H^h H^l \sum_{k=1}^K \sum_{h=1}^{H_h} P^{\pi_{k,h}}(s_{h+1}^k \neq g(s_h^k, a_h^k))
\end{aligned}$$

502

□

503 **Lemma 9.** *With probability  $\geq 1 - \delta/3$ :*

$$\sum_{k=1}^K \sum_{h=1}^{H_h} \rho_h^k \leq \sum_{s,a \in \mathcal{C}(S, A^h)} \sum_{i=1}^{N^{K, H_h}(s,a)} r(\pi_{s,a}^* - \pi_{s,a}^i) + \sum_{s,a \in \mathcal{C}(S, A^h)} \sum_{i=1}^{N^{K, H_h}(s,a)} \frac{UB(\mathcal{R}^i(s,a)) - \mathcal{R}^i(s,a) + (\kappa'' + \kappa)\psi_i}{i}$$

504 *Let  $\mathcal{E}^\rho$  be the event that this holds.*

505 *Proof.* We first expand the  $\rho_h^k$  sum:

$$\begin{aligned}
& \sum_{k=1}^K \sum_{h=1}^{H_h} \rho_h^k \\
&= \sum_{k=1}^K \sum_{h=1}^{H_h} \bar{r}_{N^{k,h}(s_h^k, a_h^k)}(s_h^k, a_h^k) + b_{r^{s_h^k, a_h^k}}(N^{k,h}(s_h^k, a_h^k)) - r(\pi_{s_h^k, a_h^k}^{N^{k,h}(s_h^k, a_h^k)}) \\
&= \sum_{s,a \in \mathcal{C}(S, A^h)} \sum_{i=1}^{N^{K, H_h}(s,a)} \bar{r}_i(s,a) + b_r^{s,a}(i) - r(\pi_{s,a}^i) \\
&= \sum_{s,a \in \mathcal{C}(S, A^h)} \sum_{i=1}^{N^{K, H_h}(s,a)} \frac{1}{i} \sum_{j=1}^i \hat{r}(\pi_{s,a}^j) + \frac{UB(\mathcal{R}^i(s,a)) + \kappa'\psi_i - \kappa \sum_{j=1}^i \mathbb{1}(s_{H_l}^{\pi_{s,a}^j} \neq g(s,a))}{i} - r(\pi_{s,a}^i) \\
&\hspace{15em} \text{(using definition of bonus)} \\
&\leq \sum_{s,a \in \mathcal{C}(S, A^h)} \sum_{i=1}^{N^{K, H_h}(s,a)} \frac{1}{i} \sum_{j=1}^i r(\pi_{s,a}^j) + \frac{H_l \psi_i}{i} + \frac{UB(\mathcal{R}^i(s,a)) + \kappa'\psi_i - \kappa \sum_{j=1}^i \mathbb{1}(s_{H_l}^{\pi_{s,a}^j} \neq g(s,a))}{i} - r(\pi_{s,a}^i) \\
&\hspace{15em} \text{(Azume-Hoeffding for concentration of } \hat{r} \text{ around } r)
\end{aligned}$$

506 Using the two-sided concentration bound we had before (the other way):  $\sum_{j=1}^i \mathbb{1}(s_{H_l}^{\pi_{s,a}^j} \neq g(s,a)) +$

507  $\psi_i \geq \sum_{j=1}^i P(s_{H_l}^{\pi_{s,a}^j} \neq g(s,a))$  w.h.p:

$$\begin{aligned}
& \sum_{j=1}^i r(\pi_{s,a}^j) - r(\pi_{s,a}^i) \geq \mathcal{R}^i(s,a) - \kappa \left( \sum_{j=1}^i \mathbb{1}(s_{H_l}^{\pi_{s,a}^j} \neq g(s,a)) + \psi_i \right) \\
& \Rightarrow \sum_{j=1}^i r(\pi_{s,a}^j) - \mathcal{R}^i(s,a) + \kappa \psi_i \geq \sum_{j=1}^i r(\pi_{s,a}^j) - \kappa \sum_{j=1}^i \mathbb{1}(s_{H_l}^{\pi_{s,a}^j} \neq g(s,a))
\end{aligned}$$

508 We continue our derivation:

$$\begin{aligned}
& \sum_{s,a \in \mathcal{C}(S, A^h)} \sum_{i=1}^{N^{K, H_h}(s,a)} \frac{1}{i} \left( \sum_{j=1}^i r(\pi_{s,a}^j) + UB(\mathcal{R}^i(s, a)) + \kappa'' \psi_i - \kappa \sum_{j=1}^i \mathbb{1}(s_{H_l}^{\pi_j} \neq g(s, a)) \right) - r(\pi_{s,a}^i) \\
& \hspace{25em} (\kappa'' = \kappa' + H_l) \\
& \leq \sum_{s,a \in \mathcal{C}(S, A^h)} \sum_{i=1}^{N^{K, H_h}(s,a)} \frac{1}{i} \left[ \sum_{j=1}^i r(\pi_{s,a}^*) - \mathcal{R}^i(s, a) + \kappa \psi_i \right] - r(\pi_{s,a}^i) + \sum_{s,a \in \mathcal{C}(S, A^h)} \sum_{i=1}^{N^{K, H_h}(s,a)} \frac{UB(\mathcal{R}^i(s, a)) + \kappa'' \psi_i}{i} \\
& \hspace{25em} \text{(using the identity above)} \\
& \leq \sum_{s,a \in \mathcal{C}(S, A^h)} \sum_{i=1}^{N^{K, H_h}(s,a)} r(\pi_{s,a}^*) - r(\pi_{s,a}^i) + \sum_{s,a \in \mathcal{C}(S, A^h)} \sum_{i=1}^{N^{K, H_h}(s,a)} \frac{UB(\mathcal{R}^i(s, a)) - \mathcal{R}^i(s, a) + (\kappa'' + \kappa) \psi_i}{i}
\end{aligned}$$

509

□

### 510 B.3.1 Overall Regret Bound

511 **Theorem 3.** Under events  $\bigcap_{s,a,n} \mathcal{E}_{s,a}^n \cap \mathcal{E}^\zeta \cap \mathcal{E}^\rho$ , we have that:

$$\sum_{k=1}^K \sum_{h=1}^{H_h} \rho_h^k + \gamma_h^k + \sigma_h^k \leq \sum_{s,a \in \mathcal{C}(S, A^h)} (\log(N^{K, H_h}(s, a)) + 1) UB(\mathcal{R}^{N^{K, H_h}(s, a)}) + O(H^h H^l \sqrt{N^{K, H_h}(s, a)})$$

*Proof.*

$$\begin{aligned} & \sum_{k=1}^K \sum_{h=1}^{H_h} \rho_h^k + \gamma_h^k + \sigma_h^k \\ & \leq \sum_{s,a \in \mathcal{C}(S, A^h)} \sum_{i=1}^{N^{K, H_h}(s, a)} r(\pi_{s,a}^*) - r(\pi_{s,a}^i) + \\ & \quad \sum_{s,a \in \mathcal{C}(S, A^h)} \sum_{i=1}^{N^{K, H_h}(s, a)} \frac{UB(\mathcal{R}^i(s, a)) - \mathcal{R}^i(s, a) + \kappa \psi_i}{i} + 2H^h H^l \sum_{k=1}^K \sum_{h=1}^{H_h} P^{\pi_{k,h}}(s_{h+1}^k \neq g(s_h^k, a_h^k)) \\ & = \sum_{s,a \in \mathcal{C}(S, A^h)} \sum_{i=1}^{N^{K, H_h}(s, a)} \frac{UB(\mathcal{R}^i(s, a)) - \mathcal{R}^i(s, a) + \kappa \psi_i}{i} \\ & \quad + \sum_{s,a \in \mathcal{C}(S, A^h)} \sum_{i=1}^{N^{K, H_h}(s, a)} r(\pi_{s,a}^*) - r(\pi_{s,a}^i) + 2H^h H^l \sum_{s,a \in \mathcal{C}(S, A^h)} \left[ \sum_{i=1}^{N^{K, H_h}(s, a)} P(s_{H_l}^{\pi_{s,a}^i} \neq g(s_h^k, a_h^k)) \right] \\ & \hspace{15em} \text{(group third sum by } s, a) \\ & \leq \sum_{s,a \in \mathcal{C}(S, A^h)} \sum_{i=1}^{N^{K, H_h}(s, a)} \frac{UB(\mathcal{R}^i(s, a)) - \mathcal{R}^i(s, a) + \kappa \psi_i}{i} \\ & \quad + \sum_{s,a \in \mathcal{C}(S, A^h)} \sum_{i=1}^{N^{K, H_h}(s, a)} r(\pi_{s,a}^*) - r(\pi_{s,a}^i) + \kappa \sum_{i=1}^{N^{K, H_h}(s, a)} P(s_{H_l}^{\pi_{s,a}^i} \neq g(s_h^k, a_h^k)) \quad (\kappa \geq 2H_h H_l) \\ & = \sum_{s,a \in \mathcal{C}(S, A^h)} \sum_{i=1}^{N^{K, H_h}(s, a)} \frac{UB(\mathcal{R}^i(s, a)) - \mathcal{R}^i(s, a) + \kappa \psi_i}{i} + \sum_{s,a \in \mathcal{C}(S, A^h)} \mathcal{R}^{N^{K, H_h}(s, a)} \\ & \hspace{15em} \text{(using the definition for sub-MDP regret)} \\ & \leq \sum_{s,a \in \mathcal{C}(S, A^h)} \sum_{i=1}^{N^{K, H_h}(s, a)} \frac{UB(\mathcal{R}^i(s, a))}{i} + \mathcal{R}^{N^{K, H_h}(s, a)} + \sum_{s,a \in \mathcal{C}(S, A^h)} \sum_{i=1}^{N^{K, H_h}(s, a)} \frac{\kappa \psi_i}{i} \\ & \leq \sum_{s,a \in \mathcal{C}(S, A^h)} \sum_{i=1}^{N^{K, H_h}(s, a)} \frac{UB(\mathcal{R}^i(s, a))}{i} + UB(\mathcal{R}^{N^{K, H_h}(s, a)}) + \sum_{s,a \in \mathcal{C}(S, A^h)} O(\kappa \sqrt{N^{K, H_h}(s, a)}) \\ & \hspace{15em} \text{(since Azuma-Hoeffding is s.t } \psi_i = O(\sqrt{i})) \\ & \leq \sum_{s,a \in \mathcal{C}(S, A^h)} \sum_{i=1}^{N^{K, H_h}(s, a)} \frac{UB(\mathcal{R}^{N^{K, H_h}(s, a)})}{i} + UB(\mathcal{R}^{N^{K, H_h}(s, a)}) + \sum_{s,a \in \mathcal{C}(S, A^h)} O(H^h H^l \sqrt{N^{K, H_h}(s, a)}) \\ & \hspace{15em} \text{(using monotonicity of upper bound } UB(\mathcal{R}^i(s, a)) \text{ in } i, \text{ assumption that } C = O(H_h H_l)) \\ & = \sum_{s,a \in \mathcal{C}(S, A^h)} (\log(N^{K, H_h}(s, a)) + 1) UB(\mathcal{R}^{N^{K, H_h}(s, a)}) + O(H^h H^l \sqrt{N^{K, H_h}(s, a)}) \end{aligned}$$

512

□

513 **Corollary 4** (Regret under  $|\mathcal{C}(S, A^h)|$  clusters of isomorphic sub-MDPs [25]). *Let us set UCB-VI to*  
 514 *be the sub-MDP learning algorithm, then we have the following regret bound:*

$$\begin{aligned}
 & \sum_{s,a \in \mathcal{C}(S, A^h)} (\log(N^{K, H_h}(s, a)) + 1) \mathcal{R}^{N^{K, H_h}(s, a)} + O(H^h H^l \sqrt{N^{K, H_h}(s, a)}) \\
 & \leq (\log H^h K + 1) \sum_{s,a \in \mathcal{C}(S, A^h)} \mathcal{R}^{N^{K, H_h}(s, a)} + O(H^h H^l \sqrt{|\mathcal{C}(S, A^h)| \cdot H^h K}) \\
 & \quad (\sum_{s,a \in \mathcal{C}(S, A^h)} N^{K, H_h}(s, a) = H^h K) \\
 & \leq (\log H^h K + 1) \sum_{s,a \in \mathcal{C}(S, A^h)} H_l^{3/2} \sqrt{|S_{s,a}^l| |A| N^{K, H_h}(s, a)} + O(H^h H^l \sqrt{|\mathcal{C}(S, A^h)| \cdot H^h K}) \\
 & \quad (\text{plug in UCB-VI guarantees}) \\
 & \leq \tilde{O}(H_l^{3/2} \sqrt{\max_{s,a} |S_{s,a}^l| |A|} \sqrt{|\mathcal{C}(S, A^h)| (H_h K)} + H_h H_l \sqrt{|\mathcal{C}(S, A^h)| H_h K}) \\
 & \quad (\sum_{s,a \in \mathcal{C}(S, A^h)} N^{K, H_h}(s, a) = H^h K)
 \end{aligned}$$

515 *using UCB-VI's guarantee that upper bound  $UB(\mathcal{R}^{N^{K, H_h}(s, a)}) = H_l^{3/2} \sqrt{|S_{s,a}^l| |A| N^{K, H_h}(s, a)}$ .*

516 **Remark 3** (High Probability Bound). *For completeness, we show that the regret bound holds with*  
 517 *probability greater than  $1 - \delta$ . The regret bound holds under  $\bigcap_{s,a,n} \mathcal{E}_{s,a}^n \cap \mathcal{E}^\zeta \cap \mathcal{E}^\rho$ , by union bound:*

$$\begin{aligned}
 & \Pr\left(\bigcap_{s,a,n} \mathcal{E}_{s,a}^n \cap \mathcal{E}^\zeta \cap \mathcal{E}^\rho\right) \\
 & \geq 1 - \sum_{s,a,n} \Pr(\neg \mathcal{E}_{s,a}^n) - \Pr(\neg \mathcal{E}^\zeta) - \Pr(\neg \mathcal{E}^\rho) \\
 & \geq 1 - (|\mathcal{C}(S, A^h)| H_h K) \frac{\delta}{3|\mathcal{C}(S, A^h)| H_h K} - \delta/3 - \delta/3 \\
 & = 1 - \delta
 \end{aligned}$$

## C Proofs for Section 4

### C.1 Low-level Feedback is insufficient for learning

To prove the results below, our approach is to construct two MDP instances with identical low level feedback such that any deterministic learning algorithm picks the arbitrarily worse high level policy.

**Proposition 4** (Non-identifiability of ranking among sub-MDP returns). *For any deterministic high-level policy learning algorithm with  $N_l$  samples of low-level feedback, there exists a MDP instance that induces regret constant in  $N_l$ .*

*Proof.* Consider two-horizon MDP with starting state  $s_1$  with  $H_h = 1$ ,  $H_l = 2$ . There are two possible high-level actions  $a_1$  and  $a_2$  at  $s_1$ .

For any policy  $\pi^1$  in sub-MDP  $M(s_1, a_1)$ , let it have feature expectation  $\phi(\pi^1) = [\phi'(\pi^1), 1, 0]$ , and for any  $\pi^2$  in sub-MDP  $M(s_1, a_2)$ ,  $\phi(\pi^2) = [\phi'(\pi^2), 0, 1]$ .

Now, we consider two MDP instances with  $\theta^* = [0, 0, C']$  and  $\theta^* = [0, C', 0]$  for some positive constant  $C'$ .

Under both instances, we observe identical low-level feedback for trajectories  $\tau, \tau'$  in sub-MDPs  $M(s_1, a_j)$ ,  $j \in [2]$ : the feedback is Bernoulli with parameter  $\sigma(\langle \phi'(\tau) - \phi'(\tau'), \theta^* \rangle)$ .

Consider any deterministic learning algorithm. WLOG it outputs high level policy  $\pi^h(s_1) = a_1$  with some set of  $N_l$  samples of low-level feedback.

Then, it follows that its regret under  $\theta^* = [\epsilon 1, 0, C']$  is  $C'$ , since the reward (and return since  $H_h = 1$ ) of  $\pi_{s_1, a_1}^*$  is 0, while the reward of the optimal policy which visits  $M(s_1, a_2)$  is  $C'$ .

□

### C.2 Hierarchical Experiment Design via REGIME [29]

#### C.2.1 MLE Definition:

We first define the MLE expression; note that the MLE is in terms of trajectories only. Define:

$$f(\{y_i\}_{i=1}^n, \{x_i\}_{i=1}^n) = - \sum_{i=1}^n \log(\mathbb{1}\{y_i = 1\} \sigma(\theta^T x_i) + \mathbb{1}\{y_i = 0\} (1 - \sigma(\theta^T x_i)))$$

$$\ell_D(\theta) = f(\{y_i\}_{i=1}^{N_h}, \{x_i\}_{i=1}^{N_h}) + \sum_{s,a} f(\{y_i^{s,a}\}_{i=1}^{N_l}, \{x_i^{s,a}\}_{i=1}^{N_l}) \quad (5)$$

- **High-level trajectories:** has realized features,

$$x_i = \phi^{\pi^{N_l}, P}(\tau_1^i) - \phi^{\pi^{N_l}, P}(\tau_2^i) = \sum_{j=1}^{H_h} \phi^P(\pi^{N_l}(s_j^{\tau_1^i}, a_j^{\tau_1^i})) - \sum_{j=1}^{H_h} \phi^P(\pi^{N_l}(s_j^{\tau_2^i}, a_j^{\tau_2^i}))$$

where  $\phi^{\pi^{N_l}, P}(\tau_j^i)$  is the feature of the high-level trajectory under sub-policy  $\pi^{N_l}$  and transition  $P$  (since trajectories are collected from roll-outs in the actual MDP as in [29]).

On the other hand, under idealized-feedback, the labeler assumes that each goal-conditioned sub-MDP has been executed perfectly (i.e. by  $\pi_{s,a}^*$ ) and so the features correspond to:

$$x_i^* = \phi^{\pi^*, P}(\tau_1^i) - \phi^{\pi^*, P}(\tau_2^i) = \sum_{j=1}^{H_h} \phi^P(\pi^*(s_j^{\tau_1^i}, a_j^{\tau_1^i})) - \sum_{j=1}^{H_h} \phi^P(\pi^*(s_j^{\tau_2^i}, a_j^{\tau_2^i}))$$

- Comparison  $y$  of high level trajectories follows Bernoulli distribution  $y_i = \sigma(\theta^* \cdot x_i^*)$ .

547

- **Low-level trajectories:** has realized features,

$$x_i^{s,a} = \phi(\tau_1^i) - \phi(\tau_2^i) = \sum_{j=1}^{H_h} \phi(s_j^{\tau_1^i}, a_j^{\tau_1^i}) - \sum_{j=1}^{H_h} \phi(s_j^{\tau_2^i}, a_j^{\tau_2^i})$$

548

Note that unlike the high level features, low-level features data are always unbiased. Thus, using high level and low-level comparisons has the same bias from the high level.

549

550

- Comparison  $y$  of low level trajectories follows Bernoulli distribution  $y_i = \sigma(\theta^* \cdot x_i^{s,a})$ .

### 551 C.2.2 Requisite Lemmas

552 **Lemma 10** (Lemma 5 of [29]). *Let oracle  $P^{\epsilon'}$  be such that with probability  $1 - \delta/5$ , the following*  
 553 *holds. Let  $d_h^\pi(s, a)$  and  $\hat{d}_h^\pi(s, a)$  be the visitation measure of policy  $\pi$  under  $P$  and  $P^{\epsilon'}$ , we have for*  
 554 *all  $h \in [H]$  and  $\pi \in \Pi$ :*

$$\sum_{s,a} |d_h^\pi(s, a) - \hat{d}_h^\pi(s, a)| = \sum_s |d_h^\pi(s) - \hat{d}_h^\pi(s)| \leq h\epsilon'$$

555 This applies across all sub-MDPs  $M(s, a)$ . Let the event that this expression hold be  $\mathcal{E}^{s,a}$ .

556 **Lemma 11** (Low-level MLE Bound, Lemma 2 of [29]). *With probability at least  $1 - \delta/5$ :*

$$\|\theta^* - \theta^t\|_{\tilde{\Sigma}_n^l} \leq \tilde{O}(1)$$

557 *Let the event that this holds for learning from sub-MDP trajectories be  $\mathcal{E}_1^l$ .*

558 **Lemma 12** (Lemma 3 of [29]). *If low-level trajectories  $\tau_i^{1,2} \sim \pi^i, P^{\epsilon'}$ , then with probability at least*  
 559  *$1 - \delta/5$ :*

$$\|\theta^* - \theta^t\|_{\tilde{\Sigma}_n^l} \leq \sqrt{2}\|\theta^* - \theta^t\|_{\tilde{\Sigma}_n^l} + O(B\sqrt{d \log 4n/\delta W})$$

560 *Let the event that this holds for learning from sub-MDP trajectories be  $\mathcal{E}_2^l$ .*

### 561 C.2.3 Bias when using idealized-feedback, high level trajectory data in MLE

562 **Proposition 5** (sub-MDP REGIME guarantee of [29]). *For sub-MDP  $M(s, a)$ , under  $\mathcal{E}^{s,a} \cap \mathcal{E}_1^l \cap \mathcal{E}_2^l$ :*

$$\langle \phi^P(\pi^*), \theta^* \rangle - \langle \phi^P(\pi^{N_l}), \theta^* \rangle \leq \frac{C_1(\delta)}{\sqrt{N_l}} + O(\epsilon')$$

563 *where  $C_1(\delta) = O(\sqrt{\log(1/\delta)})$ .*

564 Note that for estimation and bias, we have to have both an upper bound and a lower bound (see PbRL  
 565 example). This requires two-sided bound, where lower bound comes from  $\phi^*$  having higher reward  
 566 than  $\phi$  and upper bound comes from no-regret. Due to optimality of  $\pi^*$ , we have the lower bound as  
 567 well:

$$0 \leq \langle \phi^P(\pi^*), \theta^* \rangle - \langle \phi^P(\pi^{N_l}), \theta^* \rangle \leq \frac{C_1}{\sqrt{N_l}} + O(\epsilon')$$

568 Additionally, we have that:

569 **Lemma 13** (Lemma 6 of [29]). *For any  $s_h, a_h$ ,  $\|v_i\| \leq 2B$ ,  $\theta \in \mathbb{R}^d$  and  $\|\phi\| \leq R$  under  $\mathcal{E}^{s,a} \cap \mathcal{E}_1^l \cap$   
 570  $\mathcal{E}_2^l$ :*

$$|\langle \phi^{P^{\epsilon'}}(\pi^{N_l}(s_h, a_h)) - \phi^P(\pi^{N_l}(s_h, a_h)), v \rangle| \leq BRd^2\epsilon'$$

571 With this,

$$|\langle \phi^P(\pi^*), \theta^* \rangle - \langle \phi^{P^{\epsilon'}}(\pi^{N_l}), \theta^* \rangle| \leq (\frac{C_1}{\sqrt{N_l}} + O(\epsilon')) + BRd^2\epsilon' = \frac{C_1}{\sqrt{N_l}} + C_2\epsilon'$$

572 Now, we can analyze the bias of including high level trajectory data in the MLE computation:

573 **Lemma 14.** *Suppose there are  $N_h, N_l$  high, low-level trajectories, bias  $b$  is such that, under*  
 574  *$\bigcap_{s,a} \mathcal{E}^{s,a} \cap \mathcal{E}_1^l \cap \mathcal{E}_2^l$ :*

$$\|b\|^2 = \sum_{t=1}^T |\langle \theta^*, x_i \rangle - \langle \theta^*, x_i^* \rangle|^2 \leq 2H_h T (2H_h (\frac{C_1}{\sqrt{N_l}} + C_2\epsilon')^2)$$



*Proof.*

$$\begin{aligned}
& \sum_{t=1}^T |\langle \theta^*, x_i^* \rangle - \langle \theta^*, x_i \rangle|^2 \\
& \leq 2 \sum_{t=1}^T \left| \left\langle \sum_{s,a \in \tau_1^t} \phi^P(\pi^*(s,a)) - \sum_{s,a \in \tau_1^t} \phi^{P^{\epsilon'}}(\pi^{N_l}(s,a)), \theta^* \right\rangle \right|^2 + \left| \left\langle \sum_{s,a \in \tau_2^t} \phi^P(\pi^*(s,a)) - \sum_{s,a \in \tau_2^t} \phi^{P^{\epsilon'}}(\pi^{N_l}(s,a)), \theta^* \right\rangle \right|^2 \\
& \leq 2H_h \sum_{t=1}^T \sum_{s,a \in \tau_1^t} |\langle \phi^P(\pi^*(s,a)) - \phi^{P^{\epsilon'}}(\pi^{N_l}(s,a)), \theta^* \rangle|^2 + \sum_{s,a \in \tau_2^t} |\langle \phi^P(\pi^*(s,a)) - \phi^{P^{\epsilon'}}(\pi^{N_l}(s,a)), \theta^* \rangle|^2 \\
& \leq 2H_h T (2H_h (\frac{C_1}{\sqrt{N_l}} + C_2 \epsilon')^2)
\end{aligned}$$

575 Thus,

$$\|b\| = \sqrt{\sum_{t=1}^T |\langle \theta^*, x_i \rangle - \langle \theta^*, x_i^* \rangle|^2} \leq 2H_h (\frac{C_1}{\sqrt{N_l}} + C_2 \epsilon') \sqrt{T}$$

576

□

## 577 C.2.4 MLE Analysis

578 Under current-feedback, following Lemma 2 of [29],  $\|\Delta\|_{\Sigma_n^h + \lambda I} \leq \tilde{O}(1)$ . Now, we consider the bias  
579 in learned reward under idealized-feedback.

580 **Proposition 6.** *Let  $\theta_{MLE} = \arg \min_{\theta} \ell_D(\theta)$  and let  $C_b \geq \|b\|$ . Then with probability at least  
581  $1 - \delta/5$ :*

$$\|\Delta\|_{\Sigma_n + \lambda I} \leq O \left( \sqrt{\frac{C_b}{\gamma^2 \sqrt{n}}} + \frac{C_b^2 + d + \log(1/\delta)}{\gamma^2 n} + \lambda B^2 \right)$$

582 where  $\Sigma_n = \frac{1}{n} \sum_{i=1}^n x_i x_i^T + \lambda I$ .

583 *Proof.* Define  $\Delta = \theta_{MLE} - \theta^*$ . As in [30], we have the same convexity result due to  
584  $\langle \theta, x_i \rangle \in [-2LB, 2LB]$ . Suppose we let  $\max_x \|x\| \leq L$  and  $\max_{\theta \in \Theta} \|\theta\| \leq B$ , then with  
585  $\gamma = \frac{1}{2 + \exp(-2LB) + \exp(2LB)}$ , we have that:

$$\ell(\theta^* + \Delta) - \ell(\theta^*) - \langle \nabla \ell(\theta^*), \Delta \rangle \geq \gamma \|\Delta\|_{\Sigma}^2$$

586 And so,

$$\ell(\theta_{MLE}) \leq \ell(\theta^*) \Rightarrow \ell(\theta^* + \Delta) - \ell(\theta^*) - \langle \nabla \ell(\theta^*), \Delta \rangle \leq -\langle \nabla \ell(\theta^*), \Delta \rangle$$

587 Thus,

$$\gamma \|\Delta\|_{\Sigma}^2 \leq \|\nabla \ell(\theta^*)\|_{(\Sigma + \lambda I)^{-1}} \|\Delta\|_{(\Sigma + \lambda I)}$$

588 The key part is bounding  $\|\nabla \ell(\theta^*)\|_{(\Sigma + \lambda I)^{-1}}$ . We have that:

$$\begin{aligned} \nabla \ell(\theta^*) &= -\frac{1}{n} \sum_{i=1}^n [\mathbb{1}\{y_i = 1\} \sigma(\langle \theta^*, x_i \rangle) - \mathbb{1}\{y_i = 0\} (1 - \sigma(\langle \theta^*, x_i \rangle))] x_i \\ &= -\frac{1}{n} X^T (V + b) \end{aligned}$$

589 where  $v_i = \sigma(\langle \theta^*, x_i^* \rangle)$  w.p  $1 - \sigma(\langle \theta^*, x_i^* \rangle)$  and  $-(1 - \sigma(\langle \theta^*, x_i^* \rangle))$  w.p  $\sigma(\langle \theta^*, x_i^* \rangle)$ . And so, entry-  
590 wise  $V$  is such that  $\mathbb{E}[V_i] = 0$  and  $|V_i| \leq 1$ . Note that  $V_i$  are independent due to the independence of  
591 the random variables  $Y_i$ .

592 Extra term bias is defined as:

$$\begin{aligned} b_i &= \mathbb{1}\{y_i = 1\} (\sigma(\langle \theta^*, x_i \rangle) - \sigma(\langle \theta^*, x_i^* \rangle)) - \mathbb{1}\{y_i = 0\} (1 - \sigma(\langle \theta^*, x_i \rangle) - (1 - \sigma(\langle \theta^*, x_i^* \rangle))) \\ &= \sigma(\langle \theta^*, x_i \rangle) - \sigma(\langle \theta^*, x_i^* \rangle) \end{aligned}$$

593 By definition,  $C_b$  is such that:  $\|b\| \leq C_b$ . As before, define  $M = \frac{1}{n^2} X(\Sigma + \lambda I)^{-1} X^T$ . We use the  
594 fact that  $\|M\|_{op} \leq 1/n$ . Then, we have that:

$$\begin{aligned}
\|\nabla \ell(\theta^*)\|_{(\Sigma+\lambda I)^{-1}}^2 &= (V+b)^T M (V+b) \\
&= V^T M V + 2V^T M b + b^T M b \\
&\leq C \frac{d + \log(1/\delta)}{n} + 2\|V\| \|M b\| + b^T M b \\
&\quad \text{(by Matrix Bernstein, } V^T M V \leq C \frac{d + \log(10/\delta)}{n} \text{ w.p. } \geq 1 - \delta/10) \\
&\leq C \frac{d + \log(1/\delta)}{n} + 2\|V\| \frac{1}{n} \|b\| + \frac{C_b^2}{n} \quad \text{(using that } \|M\|_{op} \leq 1/n) \\
&\leq C \frac{d + \log(1/\delta)}{n} + 2(C_2 \sqrt{n} \frac{1}{n}) C_b + \frac{C_b^2}{n} \\
&\quad \text{(by Hoeffding } \|V\| \leq O(\log(10/\delta)\sqrt{n}) \text{ w.p. } \geq 1 - \delta/10.) \\
&\leq O\left(\frac{C_b}{\sqrt{n}} + \frac{C_b^2 + d + \log(1/\delta)}{n}\right)
\end{aligned}$$

$$\begin{aligned}
\gamma \|\Delta\|_{\Sigma+\lambda I}^2 &\leq \|\nabla \ell(\theta^*)\|_{(\Sigma+\lambda I)^{-1}} \|\Delta\|_{(\Sigma+\lambda I)} + \lambda(\gamma \|\Delta\|^2) \\
&\leq \|\nabla \ell(\theta^*)\|_{(\Sigma+\lambda I)^{-1}} \|\Delta\|_{(\Sigma+\lambda I)} + 4\lambda\gamma B^2
\end{aligned}$$

595 This implies that with probability  $\geq 1 - \delta$ :

$$\|\Delta\|_{\Sigma+\lambda I} \leq C \sqrt{\frac{C_b}{\gamma^2 \sqrt{n}} + \frac{C_b^2 + d + \log(1/\delta)}{\gamma^2 n}} + \lambda B^2$$

596

□

597 **Corollary 5.** Let  $\theta_{MLE} = \arg \min_{\theta} \ell_D(\theta)$ , then under  $\bigcap_{s,a} \mathcal{E}^{s,a}$ , with probability  $\geq 1 - \delta/5$ :

$$\|\theta^* - \theta_{MLE}\|_{\hat{\Sigma}_{N_h} + \lambda I} \leq C \sqrt{\frac{1}{\gamma^2 \sqrt{N_l}} + \frac{1}{\gamma^2 N_l} + \frac{d + \log(1/\delta)}{\gamma^2 N_h}} + \lambda B^2$$

598 where  $\Sigma_{N_h} = \frac{1}{N_h} \sum_{i=1}^{N_h} x_i x_i^T$ .

599 Let the event that this holds for learning from sub-MDP trajectories be  $\mathcal{E}_1^h$ .

600 *Proof.* Firstly,

$$\|b\| \leq 2H_h \left( \frac{C_1}{\sqrt{N_l}} + C_2 \epsilon' \right) \sqrt{N_h} = O\left( \frac{\sqrt{N_h}}{\sqrt{N_l}} + \sqrt{N_h} \epsilon' \right)$$

601 With this, we have that:

$$\begin{aligned}
&\|\Delta\|_{\hat{\Sigma}_{N_h} + \lambda I} \\
&= O\left( \sqrt{\frac{C_b}{\gamma^2 \sqrt{N_h}} + \frac{C_b^2 + d + \log(1/\delta)}{\gamma^2 N_h}} + \lambda B^2 \right) \\
&= O\left( \sqrt{\frac{\sqrt{N_h}/N_l + \sqrt{N_h} \epsilon'}{\gamma^2 \sqrt{N_h}} + \frac{N_h/N_l + N_h \epsilon'^2 + d + \log(1/\delta)}{\gamma^2 N_h}} + \lambda B^2 \right)
\end{aligned}$$

602

□

Hence by choosing  $\lambda = \lambda/N_h$ :

$$\|\Delta\|_{\tilde{\Sigma}_{N_h} + \lambda I} \leq O\left(\frac{N_h^{1/2}}{N_l^{1/4}} + (N_h \epsilon')^{1/2}\right) + C'$$

603 **C.2.5 Relating  $\|\theta^* - \theta^n\|_{\hat{\Sigma}_n}$  to  $\|\theta^* - \theta^n\|_{\tilde{\Sigma}_n}$**

604 Define:

- 605 1.  $\Sigma_n = \lambda I + \sum_{i=1}^n (\phi^{\pi^{N_l}, P}(\pi_1^i) - \phi^{\pi^{N_l}, P}(\pi_2^i))(\phi^{\pi^{N_l}, P}(\pi_1^i) - \phi^{\pi^{N_l}, P}(\pi_2^i))^T$
- 606 2.  $\tilde{\Sigma}_n = \lambda I + \sum_{i=1}^n (\phi(\tau_1^i) - \phi(\tau_2^i))(\phi(\tau_1^i) - \phi(\tau_2^i))^T$ , where  $\tau_i^{1,2} \sim \pi_1^i, \pi^{N_l}, P$ .
- 607 3.  $\hat{\Sigma}_n = \lambda I + \sum_{i=1}^n (\phi^{\pi^{N_l}, P^{\epsilon'}}(\pi_1^i) - \phi^{\pi^{N_l}, P^{\epsilon'}}(\pi_2^i))(\phi^{\pi^{N_l}, P^{\epsilon'}}(\pi_1^i) - \phi^{\pi^{N_l}, P^{\epsilon'}}(\pi_2^i))^T$

608 We wish to relate  $\|\theta^* - \theta^n\|_{\hat{\Sigma}_n}$  to  $\|\theta^* - \theta^n\|_{\tilde{\Sigma}_n}$ .

609 **Lemma 15** (Lemma 3 of [29]). *If  $\tau_i^{1,2} \sim \pi_1^i, \pi^{N_l}, P^{\epsilon'}$ , then with probability at least  $1 - \delta/5$ :*

$$\|\theta^* - \theta^t\|_{\hat{\Sigma}_n} \leq \sqrt{2}\|\theta^* - \theta^t\|_{\tilde{\Sigma}_n} + \tilde{O}(B\sqrt{d \log 4n/\delta W})$$

610 *Let the event that this holds for learning from sub-MDP trajectories be  $\mathcal{E}_2^h$ .*

611 **Lemma 16.** *We have that under  $\bigcap_{s,a} \mathcal{E}^{s,a} \cap \mathcal{E}_1^l \cap \mathcal{E}_2^l \cap \mathcal{E}_1^h \cap \mathcal{E}_2^h$ :*

$$\|\theta^* - \theta^n\|_{\hat{\Sigma}_n} \leq 2\|\theta^* - \theta^n\|_{\tilde{\Sigma}_n} + O(B\sqrt{d \log n/\delta W}) + \sqrt{8n}C(\epsilon', \delta)$$

612 *Proof.* Under event  $\mathcal{E}_2^h$ , as trajectories are sampled from  $P$ , we have that:

$$\|\theta^* - \theta^n\|_{\Sigma_n} \leq \sqrt{2}\|\theta^* - \theta^n\|_{\tilde{\Sigma}_n} + O(B\sqrt{d \log n/\delta W})$$

613 It remains to upper bound  $\|\theta^* - \theta^n\|_{\hat{\Sigma}_n}$  by  $\|\theta^* - \theta^n\|_{\Sigma_n}$

614 We have that under  $\bigcap_{s,a} \mathcal{E}^{s,a} \cap \mathcal{E}_1^l \cap \mathcal{E}_2^l$ :

$$\begin{aligned} & |\langle \phi^{\pi^{N_l}, P}(\pi) - \phi^{\pi^{N_l}, P^{\epsilon'}}(\pi), v \rangle| \leq C(\epsilon', \delta) \\ \Rightarrow & |\langle \phi^{\pi^{N_l}, P^{\epsilon'}}(\pi_1^i) - \phi^{\pi^{N_l}, P^{\epsilon'}}(\pi_2^i), v \rangle| \leq |\langle \phi^{\pi^{N_l}, P}(\pi_1^i) - \phi^{\pi^{N_l}, P}(\pi_2^i), v \rangle| + 2C(\epsilon', \delta) \\ \Rightarrow & |\langle \phi^{\pi^{N_l}, P^{\epsilon'}}(\pi_1^i) - \phi^{\pi^{N_l}, P^{\epsilon'}}(\pi_2^i), v \rangle|^2 \leq 2|\langle \phi^{\pi^{N_l}, P}(\pi_1^i) - \phi^{\pi^{N_l}, P}(\pi_2^i), v \rangle|^2 + 2(2C(\epsilon', \delta))^2 \end{aligned}$$

615 Thus,

$$\begin{aligned} & \|v\|_{\hat{\Sigma}_n}^2 \\ &= v^T (\lambda I + \sum_{i=1}^n (\phi^{\pi^{N_l}, P^{\epsilon'}}(\pi_1^i) - \phi^{\pi^{N_l}, P^{\epsilon'}}(\pi_2^i))(\phi^{\pi^{N_l}, P^{\epsilon'}}(\pi_1^i) - \phi^{\pi^{N_l}, P^{\epsilon'}}(\pi_2^i))^T) v \\ &= \lambda \|v\|^2 + \sum_{i=1}^n |\langle \phi^{\pi^{N_l}, P^{\epsilon'}}(\pi_1^i) - \phi^{\pi^{N_l}, P^{\epsilon'}}(\pi_2^i), v \rangle|^2 \\ &\leq \lambda \|v\|^2 + \sum_{i=1}^n 2|\langle \phi^{\pi^{N_l}, P}(\pi_1^i) - \phi^{\pi^{N_l}, P}(\pi_2^i), v \rangle|^2 + 8C(\epsilon', \delta)^2 \\ &\leq 2\|v\|_{\Sigma_n}^2 + 8nC(\epsilon', \delta)^2 \end{aligned}$$

616 Plugging in  $v = \theta^* - \theta^n$ , we have that:

$$\begin{aligned}
& \|\theta^* - \theta^n\|_{\hat{\Sigma}_n} \\
& \leq \sqrt{2}\|\theta^* - \theta^n\|_{\Sigma_n} + \sqrt{8n}C(\epsilon', \delta) \\
& \leq 2\|\theta^* - \theta^n\|_{\hat{\Sigma}_n} + O(B\sqrt{d \log n / \delta W}) + \sqrt{8n}C(\epsilon', \delta)
\end{aligned}$$

617

□

618 **C.2.6 High-level policy regret bound**

619 **Lemma 17.** *For any  $\pi$ , under event  $\bigcap_{s,a} \mathcal{E}^{s,a} \cap \mathcal{E}_1^l \cap \mathcal{E}_2^l$ .*

$$\langle \phi^{\pi^*,P}(\pi) - \phi^{\pi^{N_l},P}(\pi), \theta^* \rangle \leq H_h \left( \frac{C_1}{\sqrt{N_l}} + C_2 \epsilon' \right)$$

*Proof.*

$$\begin{aligned} & \langle \phi^{\pi^*,P}(\pi) - \phi^{\pi^{N_l},P}(\pi), \theta^* \rangle \\ &= \sum_{h=1}^{H_h} \mathbb{E}_{s_h, a_h \sim \pi, \pi^{N_l}, P} \mathbb{E}_{s_{h+1} \sim \pi^{N_l}(s_h, a_h), P} [r(\pi^*(s_h, a_h)) + V_{h+1}^{\pi, \pi^*}(g(s_h, a_h)) - (r(\pi^{N_l}(s_h, a_h)) + V_{h+1}^{\pi, \pi^{N_l}}(s_{h+1}))] \\ &= \sum_{h=1}^{H_h} \mathbb{E}_{s_h, a_h \sim \pi, \pi^{N_l}, P} [r(\pi^*(s_h, a_h)) - r(\pi^{N_l}(s_h, a_h)) + P(s_{h+1}^{\pi^{N_l}} \neq g(s_h, a_h))(V_{h+1}^{\pi, \pi^*}(g(s_h, a_h)) - V_{h+1}^{\pi, \pi^{N_l}}(s_{h+1}))] \\ &\leq \sum_{h=1}^{H_h} \mathbb{E}_{s_h, a_h \sim \pi, \pi^{N_l}, P} [r(\pi^*(s_h, a_h)) - r(\pi^{N_l}(s_h, a_h)) + P(s_{h+1}^{\pi^{N_l}} \neq g(s_h, a_h)) \kappa H_h H_l] \\ &= \sum_{h=1}^{H_h} \mathbb{E}_{s_h, a_h \sim \pi, \pi^{N_l}, P} [r(\pi^*(s_h, a_h)) + P(s_{h+1}^{\pi^*} = g(s_h, a_h)) \kappa H_h H_l - r(\pi^{N_l}(s_h, a_h)) - P(s_{h+1}^{\pi^{N_l}} = g(s_h, a_h)) \kappa H_h H_l] \\ &= \sum_{h=1}^{H_h} \mathbb{E}_{s_h, a_h \sim \pi, \pi^{N_l}, P} [\langle \phi(\pi^*(s_h, a_h)), \theta^* \rangle - \langle \phi(\pi^{N_l}(s_h, a_h)), \theta^* \rangle] \\ &\leq H_h \left( \frac{C_1}{\sqrt{N_l}} + C_2 \epsilon' \right) \end{aligned}$$

620 Because for any  $s_h, a_h$ ,  $\langle \phi(\pi^*(s_h, a_h)), \theta^* \rangle - \langle \phi(\pi^{N_l}(s_h, a_h)), \theta^* \rangle \leq \frac{C_1}{\sqrt{N_l}} + C_2 \epsilon'$ .

621

□

622 **Lemma 18** (Lower bound on Reachability Probability). *We have that under event  $\bigcap_{s,a} \mathcal{E}^{s,a} \cap \mathcal{E}_1^l \cap \mathcal{E}_2^l$ :*

$$P(s_{H_l}^{\pi^{N_l}} \neq g(s, a)) \leq \frac{1}{\kappa H_h} + \frac{C_1}{\kappa H_h H_l \sqrt{N_l}} + \frac{C_2 \epsilon'}{\kappa H_h H_l}$$

623 *and*

$$P^{\epsilon'}(s_{H_l}^{\pi^{N_l}} \neq g(s, a)) \leq \frac{1}{\kappa H_h} + \frac{C_1}{\kappa H_h H_l \sqrt{N_l}} + \frac{C_2 \epsilon'}{\kappa H_h H_l} + H_l \epsilon'$$

624 *Proof.* Due to the regret guarantee, we have that:

$$\begin{aligned} & \frac{C_1}{\sqrt{N_l}} + C_2 \epsilon' \\ & \geq \langle \phi^P(\pi^*) - \phi^P(\pi^{N_l}), \theta^* \rangle \\ & = r(\pi^*) + \kappa H_h H_l \cdot 1 - r(\pi^{N_l}) - \kappa H_h H_l \cdot P(s_{H_l}^{\pi^{N_l}} = g(s, a)) \\ & \geq 0 - H_l + \kappa H_h H_l \cdot P(s_{H_l}^{\pi^{N_l}} \neq g(s, a)) \end{aligned}$$

625 Thus, we have that:

$$P(s_{H_l}^{\pi^{N_l}} \neq g(s, a)) \leq \frac{1}{\kappa H_h} + \frac{C_1}{\kappa H_h H_l \sqrt{N_l}} + \frac{C_2 \epsilon'}{\kappa H_h H_l}$$

626 Additionally, we have that from Lemma 5.1:

$$|d_{H_l}^{\pi^{N_l}}(g(s, a)) - \hat{d}_{H_l}^{\pi^{N_l}}(g(s, a))| = |P(s_{H_l}^{\pi^{N_l}} \neq g(s, a)) - P^{\epsilon'}(s_{H_l}^{\pi^{N_l}} \neq g(s, a))| \leq H_l \epsilon'$$

627 Thus,

$$P^{\epsilon'}(s_{H_l}^{\pi^{N_l}} \neq g(s, a)) \leq \frac{1}{\kappa H_h} + \frac{C_1}{\kappa H_h H_l \sqrt{N_l}} + \frac{C_2 \epsilon'}{\kappa H_h H_l} + H_l \epsilon'$$

628 □

629 Define goal non-reachability probability to be:  $\delta = \frac{1}{\kappa H_h} + \frac{C_1}{\kappa H_h H_l \sqrt{N_l}} + \frac{C_2 \epsilon'}{\kappa H_h H_l} + H_l \epsilon'$ .

630 **Lemma 19.** *Let  $\Phi^{\pi^{N_l}, P^{\epsilon'}}(\pi)$  denote the feature expectation under high level policy  $\pi$ , sub-MDP*  
 631 *policies  $\pi^{N_l}$  and MDP transitions  $P^{\epsilon'}$ . Under event  $\bigcap_{s,a} \mathcal{E}^{s,a} \cap \mathcal{E}_1^l \cap \mathcal{E}_2^l$ , we have that, for any high*  
 632 *level policy  $\pi$ :*

$$|\langle \phi^{\pi^{N_l}, P}(\pi) - \phi^{\pi^{N_l}, P^{\epsilon'}}(\pi), \theta^* \rangle| \leq 2H_h B R d^2 \epsilon' + 8H_h^3 H_l \delta$$

633 *Proof.* Let  $\mathcal{E}_{reach}$  denote the event that roll-out  $\tau \sim \pi, \pi^{N_l}, P$  is such that all high level goals are  
 634 reached, and similarly event  $\mathcal{E}'_{reach}$  for roll-out  $\tau' \sim \pi, \pi^{N_l}, P^{\epsilon'}$ .

635 By union bound,  $\Pr(\neg \mathcal{E}_{reach}) = \Pr(\exists s_i, a_i, s_{H_l}^{\pi^{N_l}(s_i, a_i)} \neq g(s_i, a_i)) \leq \sum_{i=1}^{H_h} \Pr(s_{H_l}^{\pi^{N_l}(s_i, a_i)} \neq$   
 636  $g(s_i, a_i))) \leq H_h \delta$ , and similarly  $\Pr(\neg \mathcal{E}'_{reach}) \leq H_h \delta$ .

$$\begin{aligned}
& |\langle \phi^{\pi^{N_l}, P}(\pi) - \phi^{\pi^{N_l}, P^{\epsilon'}}(\pi), \theta^* \rangle| \\
& \leq |\mathbb{E}_{\tau \sim \pi, \pi^{N_l}, P}[\langle \phi(\tau), \theta^* \rangle | \mathcal{E}_{reach}] \Pr(\mathcal{E}_{reach}) - \mathbb{E}_{\tau \sim \pi, \pi^{N_l}, P^{\epsilon'}}[\langle \phi(\tau), \theta^* \rangle | \mathcal{E}'_{reach}] \Pr(\mathcal{E}'_{reach})| \\
& + |\mathbb{E}_{\tau \sim \pi, \pi^{N_l}, P}[\langle \phi(\tau), \theta^* \rangle | \neg \mathcal{E}_{reach}] \Pr(\neg \mathcal{E}_{reach}) - \mathbb{E}_{\tau \sim \pi, \pi^{N_l}, P^{\epsilon'}}[\langle \phi(\tau), \theta^* \rangle | \neg \mathcal{E}'_{reach}] \Pr(\neg \mathcal{E}'_{reach})| \\
& \leq |\mathbb{E}_{\tau \sim \pi, \pi^{N_l}, P}[\langle \phi(\tau), \theta^* \rangle | \mathcal{E}_{reach}] \Pr(\mathcal{E}_{reach}) - \mathbb{E}_{\tau \sim \pi, \pi^{N_l}, P^{\epsilon'}}[\langle \phi(\tau), \theta^* \rangle | \mathcal{E}'_{reach}] \Pr(\mathcal{E}'_{reach})| + 2(H_h \delta)(H_h H_l) \\
& \text{(since } |\mathbb{E}_{\tau \sim \pi, \pi^{N_l}, P}[\langle \phi(\tau), \theta^* \rangle | \neg \mathcal{E}_{reach}] \Pr(\neg \mathcal{E}_{reach})| \leq (H_h \delta)(H_h H_l) \text{ and likewise the other term)} \\
& = |\Pr(\mathcal{E}_{reach}) \sum_{h=1}^{H_h} \sum_{s_h, a_h} d(s_h, a_h) \mathbb{E}[\langle \phi^P(\pi^{N_l}(s_h, a_h)), \theta^* \rangle | \mathcal{E}_{reach}] \\
& - \Pr(\mathcal{E}'_{reach}) \sum_{h=1}^{H_h} \sum_{s_h, a_h} d(s_h, a_h) \mathbb{E}[\langle \phi^{P^{\epsilon'}}(\pi^{N_l}(s_h, a_h)), \theta^* \rangle | \mathcal{E}'_{reach}]| + 2H_h^2 H_l \delta \\
& \quad \text{(under goal reachability, high-level state visitation measure } d(s_h, a_h) \text{ is the same)} \\
& \leq \sum_{h=1}^{H_h} \sum_{s_h, a_h} d(s_h, a_h) |\Pr(\mathcal{E}_{reach}) \mathbb{E}[\langle \phi^P(\pi^{N_l}(s_h, a_h)), \theta^* \rangle | \mathcal{E}_{reach}] \\
& - \Pr(\mathcal{E}'_{reach}) \mathbb{E}[\langle \phi^{P^{\epsilon'}}(\pi^{N_l}(s_h, a_h)), \theta^* \rangle | \mathcal{E}'_{reach}]| + 2H_h^2 H_l \delta \\
& = \sum_{h=1}^{H_h} \sum_{s_h, a_h} d(s_h, a_h) |\Pr(\mathcal{E}_{reach}) \mathbb{E}[\langle \phi^P(\pi^{N_l}(s_h, a_h)), \theta^* \rangle | \mathcal{E}_{s_h, a_h reach}] \\
& - \Pr(\mathcal{E}'_{reach}) \mathbb{E}[\langle \phi^{P^{\epsilon'}}(\pi^{N_l}(s_h, a_h)), \theta^* \rangle | \mathcal{E}'_{s_h, a_h reach}]| + 2H_h^2 H_l \delta \\
& \quad (\mathcal{E}_{s_h, a_h reach} \text{ is the event that } g(s_h, a_h) \text{ is reached under } \pi^{N_l}, P) \\
& \leq \sum_{h=1}^{H_h} \sum_{s_h, a_h} d(s_h, a_h) \Pr(\mathcal{E}_{reach}) |\mathbb{E}[\langle \phi^P(\pi^{N_l}(s_h, a_h)), \theta^* \rangle | \mathcal{E}_{s_h, a_h reach}] - \mathbb{E}[\langle \phi^{P^{\epsilon'}}(\pi^{N_l}(s_h, a_h)), \theta^* \rangle | \mathcal{E}'_{s_h, a_h reach}]| \\
& + |(\Pr(\mathcal{E}_{reach}) - \Pr(\mathcal{E}'_{reach})) \mathbb{E}[\langle \phi^{P^{\epsilon'}}(\pi^{N_l}(s_h, a_h)), \theta^* \rangle | \mathcal{E}'_{s_h, a_h reach}]| + 2H_h^2 H_l \delta \\
& \leq \sum_{h=1}^{H_h} \sum_{s_h, a_h} d(s_h, a_h) \left( |\mathbb{E}[\langle \phi^P(\pi^{N_l}(s_h, a_h)), \theta^* \rangle | \mathcal{E}_{s_h, a_h reach}] - \mathbb{E}[\langle \phi^{P^{\epsilon'}}(\pi^{N_l}(s_h, a_h)), \theta^* \rangle | \mathcal{E}'_{s_h, a_h reach}]| + (H_h \delta)(H_h H_l) \right) \\
& + 2H_h^2 H_l \delta \quad \text{(since } \Pr(\mathcal{E}'_{reach}), \Pr(\mathcal{E}_{reach}) \in [1 - H_h \delta, 1])
\end{aligned}$$

637 To finish, we will relate the expression to  $|\langle \phi^{P^{\epsilon'}}(\pi^{N_l}(s_h, a_h)) - \phi(\pi^{N_l}(s_h, a_h)), \theta^* \rangle|$ .



$$\begin{aligned}
&\leq \sum_{h=1}^{H_h} \sum_{s_h, a_h} d(s_h, a_h) |\mathbb{E}[\langle \phi^P(\pi^{N_l}(s_h, a_h)), \theta^* \rangle | \mathcal{E}_{s_h, a_h \text{ reach}}] - \mathbb{E}[\langle \phi^{P^{\epsilon'}}(\pi^{N_l}(s_h, a_h)), \theta^* \rangle | \mathcal{E}'_{s_h, a_h \text{ reach}}]| + 3H_h^3 H_l \delta \\
&= \sum_{h=1}^{H_h} \sum_{s_h, a_h} d(s_h, a_h) \left| \frac{1}{\Pr(\mathcal{E}_{s_h, a_h \text{ reach}})} \Pr(\mathcal{E}_{s_h, a_h \text{ reach}}) \mathbb{E}[\langle \phi^P(\pi^{N_l}(s_h, a_h)), \theta^* \rangle | \mathcal{E}_{s_h, a_h \text{ reach}}] \right. \\
&\quad \left. - \frac{1}{\Pr(\mathcal{E}'_{s_h, a_h \text{ reach}})} \Pr(\mathcal{E}'_{s_h, a_h \text{ reach}}) \mathbb{E}[\langle \phi^{P^{\epsilon'}}(\pi^{N_l}(s_h, a_h)), \theta^* \rangle | \mathcal{E}'_{s_h, a_h \text{ reach}}] \right| + 3H_h^3 H_l \delta \\
&\leq \sum_{h=1}^{H_h} \sum_{s_h, a_h} d(s_h, a_h) \frac{1}{\Pr(\mathcal{E}_{s_h, a_h \text{ reach}})} |\Pr(\mathcal{E}_{s_h, a_h \text{ reach}}) \mathbb{E}[\langle \phi^P(\pi^{N_l}(s_h, a_h)), \theta^* \rangle | \mathcal{E}_{s_h, a_h \text{ reach}}] \\
&\quad - \Pr(\mathcal{E}'_{s_h, a_h \text{ reach}}) \mathbb{E}[\langle \phi^{P^{\epsilon'}}(\pi^{N_l}(s_h, a_h)), \theta^* \rangle | \mathcal{E}'_{s_h, a_h \text{ reach}}]| + H_h \left( \left( \frac{1}{1-\delta} - 1 \right) H_h H_l \right) + 3H_h^3 H_l \delta \\
&\quad (\diamond)
\end{aligned}$$

$$\begin{aligned}
&\leq \sum_{h=1}^{H_h} \sum_{s_h, a_h} d(s_h, a_h) \frac{1}{1-\delta} |\Pr(\neg \mathcal{E}_{s_h, a_h \text{ reach}}) \mathbb{E}[\langle \phi^P(\pi^{N_l}(s_h, a_h)), \theta^* \rangle | \neg \mathcal{E}_{s_h, a_h \text{ reach}}] \\
&\quad - \Pr(\neg \mathcal{E}'_{s_h, a_h \text{ reach}}) \mathbb{E}[\langle \phi^{P^{\epsilon'}}(\pi^{N_l}(s_h, a_h)), \theta^* \rangle | \neg \mathcal{E}'_{s_h, a_h \text{ reach}}]| + \\
&\quad |\mathbb{E}[\langle \phi^{P^{\epsilon'}}(\pi^{N_l}(s_h, a_h)) - \phi^P(\pi^{N_l}(s_h, a_h)), \theta^* \rangle]| + 4H_h^3 H_l \delta \quad (\text{using that } \frac{1}{1-\delta} - 1 \leq 1) \\
&\leq \sum_{h=1}^{H_h} \sum_{s_h, a_h} d(s_h, a_h) \frac{1}{1-\delta} (2(\delta)(H_h H_l) + BRd^2 \epsilon') + 4H_h^3 H_l \delta \quad (\diamond \diamond) \\
&\leq \sum_{h=1}^{H_h} \sum_{s_h, a_h} d(s_h, a_h) 2(2H_h H_l \delta + BRd^2 \epsilon') + 4H_h^3 H_l \delta \quad (\frac{1}{1-\delta} \leq 2) \\
&\leq 2H_h BRd^2 \epsilon' + 8H_h^3 H_l \delta = C(\epsilon', \delta)
\end{aligned}$$

$$\begin{aligned}
638 \quad (\diamond) : & \left| \frac{\Pr(\mathcal{E}'_{s_h, a_h \text{ reach}})}{\Pr(\mathcal{E}_{s_h, a_h \text{ reach}})} - 1 \right| \leq \max(1 - (1 - \delta) \frac{1}{1-\delta} - 1) \text{ since } \Pr(\mathcal{E}'_{s_h, a_h \text{ reach}}), \Pr(\mathcal{E}_{s_h, a_h \text{ reach}}) \in \\
639 \quad & [1 - \delta, 1].
\end{aligned}$$

$$\begin{aligned}
640 \quad (\diamond \diamond) : & |\langle \phi^{P^{\epsilon'}}(\pi^{N_l}(s_h, a_h)) - \phi^P(\pi^{N_l}(s_h, a_h)), v \rangle| \leq BRd^2 \epsilon' \quad \text{and} \\
641 \quad & \Pr(\neg \mathcal{E}_{s_h, a_h \text{ reach}}), \Pr(\neg \mathcal{E}'_{s_h, a_h \text{ reach}}) \in [0, \delta]
\end{aligned}$$

642

□

**Lemma 20** (use of the Elliptical Lemma).

$$\langle \phi^{\pi^{N_l, P^{\epsilon'}}}(\pi^*) - \phi^{\pi^{N_l, P^{\epsilon'}}}(\hat{\pi}), \theta^* - \hat{\theta} \rangle \leq \frac{1}{\sqrt{N_h}} (2d \log(1 + \frac{N_h}{d})) \|\theta^* - \hat{\theta}\|_{\hat{\Sigma}_{N_h}}$$

*Proof.*

$$\begin{aligned} & \langle \phi^{\pi^{N_l, P^{\epsilon'}}}(\pi^*) - \phi^{\pi^{N_l, P^{\epsilon'}}}(\hat{\pi}), \theta^* - \hat{\theta} \rangle \\ & \leq \|\phi^{\pi^{N_l, P^{\epsilon'}}}(\pi^*) - \phi^{\pi^{N_l, P^{\epsilon'}}}(\hat{\pi})\|_{\hat{\Sigma}_{N_h}^{-1}} \|\theta^* - \hat{\theta}\|_{\hat{\Sigma}_{N_h}} \\ & \leq \frac{1}{N_h} \sum_{i=1}^{N_h} \|\phi^{\pi^{N_l, P^{\epsilon'}}}(\pi^*) - \phi^{\pi^{N_l, P^{\epsilon'}}}(\hat{\pi})\|_{\hat{\Sigma}_i^{-1}} \|\theta^* - \hat{\theta}\|_{\hat{\Sigma}_{N_h}} \quad (\hat{\Sigma}_{N_h}^{-1} \preceq \hat{\Sigma}_i^{-1}) \\ & \leq \frac{1}{N_h} \sum_{i=1}^{N_h} \|\phi^{\pi^{N_l, P^{\epsilon'}}}(\pi_1^i) - \phi^{\pi^{N_l, P^{\epsilon'}}}(\pi_2^i)\|_{\hat{\Sigma}_i^{-1}} \|\theta^* - \hat{\theta}\|_{\hat{\Sigma}_{N_h}} \quad (\text{definition of } \pi_{1,2}^i) \\ & \leq \frac{1}{\sqrt{N_h}} \sqrt{\sum_{i=1}^{N_h} \|\phi^{\pi^{N_l, P^{\epsilon'}}}(\pi_1^i) - \phi^{\pi^{N_l, P^{\epsilon'}}}(\pi_2^i)\|_{\hat{\Sigma}_i^{-1}}^2} \|\theta^* - \hat{\theta}\|_{\hat{\Sigma}_{N_h}} \\ & \leq \frac{1}{\sqrt{N_h}} (2d \log(1 + \frac{N_h}{d})) \|\theta^* - \hat{\theta}\|_{\hat{\Sigma}_{N_h}} \quad (\text{Elliptical Lemma}) \end{aligned}$$

643

□

644 **Theorem 4** (Main regret bound). *We have that under event  $\bigcap_{s,a} \mathcal{E}^{s,a} \cap \mathcal{E}_1^l \cap \mathcal{E}_2^l \cap \mathcal{E}_1^h \cap \mathcal{E}_2^h$  and*  
 645  *$N_h > 0$ :*

$$V^{\pi^*, \pi^*} - V^{\hat{\pi}, \pi^{N_l}} \leq \tilde{O} \left( N_l^{-1/2} + N_h^{-1/2} \|\theta^* - \hat{\theta}\|_{\hat{\Sigma}_{N_h}} \right)$$

*Proof.*

$$\begin{aligned} & V^{\pi^*, \pi^*} - V^{\hat{\pi}, \pi^{N_l}} \\ & = \langle \phi^{\pi^*, P}(\pi^*) - \phi^{\pi^{N_l}, P}(\hat{\pi}), \theta^* \rangle \\ & = \langle \phi^{\pi^*, P}(\pi^*) - \phi^{\pi^{N_l}, P}(\pi^*), \theta^* \rangle + \langle \phi^{\pi^{N_l}, P}(\pi^*) - \phi^{\pi^{N_l}, P}(\hat{\pi}), \theta^* \rangle \\ & \quad (\text{first term} = \text{sub-MDP sub-optimality}; \text{second term} = \text{high-level policy sub-optimality}) \\ & \leq H_h \left( \frac{C_1}{\sqrt{N_l}} + C_2 \epsilon' \right) + \langle \phi^{\pi^{N_l}, P}(\pi^*) - \phi^{\pi^{N_l}, P}(\hat{\pi}), \theta^* \rangle \\ & \leq H_h \left( \frac{C_1}{\sqrt{N_l}} + C_2 \epsilon' \right) + \langle \phi^{\pi^{N_l}, P^{\epsilon'}}(\pi^*) - \phi^{\pi^{N_l}, P^{\epsilon'}}(\hat{\pi}), \theta^* \rangle \\ & \quad + |\langle \phi^{\pi^{N_l}, P}(\pi^*) - \phi^{\pi^{N_l}, P^{\epsilon'}}(\pi^*), \theta^* \rangle| + |\langle \phi^{\pi^{N_l}, P^{\epsilon'}}(\hat{\pi}) - \phi^{\pi^{N_l}, P}(\hat{\pi}), \theta^* \rangle| \\ & \leq H_h \left( \frac{C_1}{\sqrt{N_l}} + C_2 \epsilon' \right) + 2C(\epsilon', \delta) + \langle \phi^{\pi^{N_l}, P^{\epsilon'}}(\pi^*) - \phi^{\pi^{N_l}, P^{\epsilon'}}(\hat{\pi}), \theta^* - \hat{\theta} \rangle + \langle \phi^{\pi^{N_l}, P^{\epsilon'}}(\pi^*) - \phi^{\pi^{N_l}, P^{\epsilon'}}(\hat{\pi}), \hat{\theta} \rangle \\ & \quad (\text{expand out the second term}) \\ & \leq H_h \left( \frac{C_1}{\sqrt{N_l}} + C_2 \epsilon' \right) + 2C(\epsilon', \delta) + \langle \phi^{\pi^{N_l}, P^{\epsilon'}}(\pi^*) - \phi^{\pi^{N_l}, P^{\epsilon'}}(\hat{\pi}), \theta^* - \hat{\theta} \rangle \\ & \quad (\text{definition of } \hat{\pi}: \langle \phi^{\pi^{N_l}, P^{\epsilon'}}(\pi^*) - \phi^{\pi^{N_l}, P^{\epsilon'}}(\hat{\pi}), \hat{\theta} \rangle \leq 0) \\ & \leq H_h \left( \frac{C_1}{\sqrt{N_l}} + C_2 \epsilon' \right) + 2C(\epsilon', \delta) + \frac{1}{\sqrt{N_h}} (2d \log(1 + \frac{N_h}{d})) \|\theta^* - \hat{\theta}\|_{\hat{\Sigma}_{N_h}} \\ & \quad (\text{use of Elliptical lemma}) \end{aligned}$$

646

□

647 **Data Tradeoff:** Using the above bound, we can derive the following rates:

- 648 • Under idealized-feedback and requiring both high- and low-level feedback, the overall rate  
649 comes out to  $O(N_l^{-1/4} + N_h^{-1/2})$ .

650 This is because  $\hat{\Sigma}_{N_h} = O\left(\frac{N_h^{1/2}}{N_l^{1/4}} + 1\right)$ . Thus, the dominating factor is the bias of the  
651 reward learning.

- 652 • Under current-feedback and requiring both high- and low-level feedback, the overall rate  
653 comes out to  $O(N_l^{-1/2} + N_h^{-1/2})$ .

654 This is because  $\|\theta^* - \hat{\theta}\|_{\hat{\Sigma}_{N_h}} = O(1)$ .

- 655 • Under only low-level feedback (due to sufficiency in coverage), the overall rate comes out  
656 to  $O(N_l^{-1/2})$ .

657 We have that:

$$\begin{aligned}
& \langle \phi^{\pi^{N_l}, P^{\epsilon'}}(\pi^*) - \phi^{\pi^{N_l}, P^{\epsilon'}}(\hat{\pi}), \theta^* - \hat{\theta} \rangle \\
& \leq \|\phi^{\pi^{N_l}, P^{\epsilon'}}(\pi^*) - \phi^{\pi^{N_l}, P^{\epsilon'}}(\hat{\pi})\|_{\hat{\Sigma}_{N_l}^{-1}} \|\theta^* - \hat{\theta}\|_{\hat{\Sigma}_{N_l}} \quad (\hat{\Sigma}_{N_h}^{-1} \preceq \hat{\Sigma}_i^{-1}) \\
& \leq \frac{1}{N_h} \sum_{i=1}^{N_h} \|\phi^{P^{\epsilon'}}(\pi_1^i) - \phi^{P^{\epsilon'}}(\pi_2^i)\|_{\hat{\Sigma}_i^{-1}} \|\theta^* - \hat{\theta}\|_{\hat{\Sigma}_{N_l}} \quad (\diamond) \\
& \leq \frac{1}{\sqrt{N_l}} (2d \log(1 + \frac{N_l}{d})) \|\theta^* - \hat{\theta}\|_{\hat{\Sigma}_{N_l}}
\end{aligned}$$

658  $(\diamond)$  : since low-level policy feature expectation is a superset of high-level policy expecta-  
659 tion, it follows that by choice of low-level policies  $\pi_1^i, \pi_2^i$ :  $\|\phi^{P^{\epsilon'}}(\pi_1^i) - \phi^{P^{\epsilon'}}(\pi_2^i)\|_{\hat{\Sigma}_i^{-1}} \geq$   
660  $\|\phi^{\pi^{N_l}, P^{\epsilon'}}(\pi^*) - \phi^{\pi^{N_l}, P^{\epsilon'}}(\hat{\pi})\|_{\hat{\Sigma}_{N_l}^{-1}}$

661 Moreover, since low-level feedback is always unbiased,  $\|\theta^* - \hat{\theta}\|_{\hat{\Sigma}_{N_l}} = O(1)$ . Thus, the  
662 overall rate comes out to  $O(N_l^{-1/2})$ .

663 **Remark 4 (High Probability Guarantee).** *For completeness, we show that the theorem statement*  
664 *holds with probability at least  $1 - \delta$ :*

$$\begin{aligned}
& \Pr\left(\bigcap_{s,a} \mathcal{E}^{s,a} \cap \mathcal{E}_1^l \cap \mathcal{E}_2^l \cap \mathcal{E}_1^h \cap \mathcal{E}_2^h\right) \\
& \geq 1 - \Pr\left(\neg \bigcap_{s,a} \mathcal{E}^{s,a}\right) = \Pr(\neg \mathcal{E}_1^l) + \Pr(\neg \mathcal{E}_2^l) + \Pr(\neg \mathcal{E}_1^h) + \Pr(\neg \mathcal{E}_2^h) \\
& \geq 1 - \delta/5 - \delta/5 - \delta/5 - \delta/5 \\
& = 1 - \delta
\end{aligned}$$

## 665 C.2.7 Additional Guarantees

666 In addition, we derive requisite conditions on the constants for idealized-feedback (the most interesting  
667 case).

668 **Necessary Auxiliary Parameters Bound:** We have that,

$$\begin{aligned}
& H_h \left( \frac{C_1}{\sqrt{N_l}} + C_2 \epsilon' \right) + 2C(\epsilon', \delta) + \frac{1}{\sqrt{N_h}} (2d \log(1 + \frac{N_h}{d})) \|\theta^* - \hat{\theta}\|_{\hat{\Sigma}_{N_h}} \\
& \leq H_h \left( \frac{C_1}{\sqrt{N_l}} + C_2 \epsilon' \right) + 2C(\epsilon', \delta) + N_h^{-1/2} 2d \left( 2\|\theta^* - \theta^{N_h}\|_{\hat{\Sigma}_{N_h}} + O(B\sqrt{d \log N_h / \delta W}) + \sqrt{8N_h} C(\epsilon', \delta) \right) \\
& \leq H_h \left( \frac{C_1}{\sqrt{N_l}} + C_2 \epsilon' \right) + (8d + 2)C(\epsilon', \delta) + N_h^{-1/2} 2d \left( \left( \frac{N_h^{1/2}}{N_l^{1/4}} + (N_h \epsilon')^{1/2} \right) + C' + O(B\sqrt{d \log N_h / \delta W}) \right) \\
& \leq (H_h C_1) N_l^{-1/2} + 2d N_l^{-1/4} + C_2 H_h \epsilon' + d \epsilon'^{1/2} + 9d C(\epsilon', \delta) + 2d C'' N_h^{-1/2} \\
& = (H_h C_1) N_l^{-1/2} + 2d N_l^{-1/4} + C_2 H_h \epsilon' + d \epsilon'^{1/2} + 9d (2H_h B R d^2 \epsilon' + 8H_h^3 H_l \delta) + 2d C'' N_h^{-1/2} \\
& \leq (2d + H_h C_1) N_l^{-1/4} + (C_2 H_h + 18d^3 H_h B R) \epsilon' + 72d H_h^3 H_l \delta + 2d C'' N_h^{-1/2}
\end{aligned}$$

669 Setting the upper bound to be below  $\epsilon$ , or each term to be below  $\epsilon/4$ , we obtain the following bounds:

670 •  $N_l \geq O\left(\frac{(d+H_h C_1)^4}{\epsilon^4}\right).$

671 •  $N_h \geq O\left(\frac{d^2}{\epsilon^2}\right).$

672 •  $\kappa \geq O\left(\frac{dH_h^2 H_l}{\epsilon}\right):$

673  $72dH_h^3 H_l \delta \leq \epsilon/4 \Rightarrow \delta \leq O\left(\frac{\epsilon}{dH_h^3 H_l}\right).$

674 Recall  $\delta = \frac{1}{\kappa H_h} + \frac{C_1}{\kappa H_h H_l \sqrt{N_l}} + \frac{C_2 \epsilon'}{\kappa H_h H_l} + H_l \epsilon'.$

675 This implies that  $\kappa \geq O\left(\frac{dH_h^2 H_l}{\epsilon}\right)$  and  $\epsilon \leq O\left(\frac{\epsilon}{dH_h^3 H_l^2}\right).$

676 •  $\epsilon' \leq O(\min(\frac{\epsilon}{dH_h^3 H_l^2}, \frac{\epsilon}{d^3 H_h B R})):$

677 Finally, we also require that  $(C_2 H_h + 18d^3 H_h B R) \epsilon' \leq \epsilon/4 \Rightarrow \epsilon' \leq O\left(\frac{\epsilon}{d^3 H_h B R}\right).$  Thus,

678 we need that  $\epsilon' \leq O(\min(\frac{\epsilon}{dH_h^3 H_l^2}, \frac{\epsilon}{d^3 H_h B R})).$

## D NeurIPS paper checklist

Please read the checklist guidelines carefully for information on how to answer these questions. For each question in the checklist:

- You should answer [Yes], [No], or [NA].
- [NA] means either that the question is Not Applicable for that particular paper or the relevant information is Not Available.
- Please provide a short (1–2 sentence) justification right after your answer (even for NA).

### 1. Claims

Question: Do the main claims made in the abstract and introduction accurately reflect the paper's contributions and scope?

Answer: [Yes]

Justification: Our paper contains everything that is covered in the abstract.

Guidelines:

- The answer NA means that the abstract and introduction do not include the claims made in the paper.
- The abstract and/or introduction should clearly state the claims made, including the contributions made in the paper and important assumptions and limitations. A No or NA answer to this question will not be perceived well by the reviewers.
- The claims made should match theoretical and experimental results, and reflect how much the results can be expected to generalize to other settings.
- It is fine to include aspirational goals as motivation as long as it is clear that these goals are not attained by the paper.

### 2. Limitations

Question: Does the paper discuss the limitations of the work performed by the authors?

Answer: [Yes]

Justification: This is covered in the "Discussions" section.

Guidelines:

- The answer NA means that the paper has no limitation while the answer No means that the paper has limitations, but those are not discussed in the paper.
- The authors are encouraged to create a separate "Limitations" section in their paper.
- The paper should point out any strong assumptions and how robust the results are to violations of these assumptions (e.g., independence assumptions, noiseless settings, model well-specification, asymptotic approximations only holding locally). The authors should reflect on how these assumptions might be violated in practice and what the implications would be.
- The authors should reflect on the scope of the claims made, e.g., if the approach was only tested on a few datasets or with a few runs. In general, empirical results often depend on implicit assumptions, which should be articulated.
- The authors should reflect on the factors that influence the performance of the approach. For example, a facial recognition algorithm may perform poorly when image resolution is low or images are taken in low lighting. Or a speech-to-text system might not be used reliably to provide closed captions for online lectures because it fails to handle technical jargon.
- The authors should discuss the computational efficiency of the proposed algorithms and how they scale with dataset size.
- If applicable, the authors should discuss possible limitations of their approach to address problems of privacy and fairness.
- While the authors might fear that complete honesty about limitations might be used by reviewers as grounds for rejection, a worse outcome might be that reviewers discover limitations that aren't acknowledged in the paper. The authors should use their best

judgment and recognize that individual actions in favor of transparency play an important role in developing norms that preserve the integrity of the community. Reviewers will be specifically instructed to not penalize honesty concerning limitations.

### 3. Theory Assumptions and Proofs

Question: For each theoretical result, does the paper provide the full set of assumptions and a complete (and correct) proof?

Answer: [Yes]

Justification: All the proofs for results are included in the appendix.

Guidelines:

- The answer NA means that the paper does not include theoretical results.
- All the theorems, formulas, and proofs in the paper should be numbered and cross-referenced.
- All assumptions should be clearly stated or referenced in the statement of any theorems.
- The proofs can either appear in the main paper or the supplemental material, but if they appear in the supplemental material, the authors are encouraged to provide a short proof sketch to provide intuition.
- Inversely, any informal proof provided in the core of the paper should be complemented by formal proofs provided in appendix or supplemental material.
- Theorems and Lemmas that the proof relies upon should be properly referenced.

### 4. Experimental Result Reproducibility

Question: Does the paper fully disclose all the information needed to reproduce the main experimental results of the paper to the extent that it affects the main claims and/or conclusions of the paper (regardless of whether the code and data are provided or not)?

Answer: [NA]

Justification: This is a theory paper that has no experiments section.

Guidelines:

- The answer NA means that the paper does not include experiments.
- If the paper includes experiments, a No answer to this question will not be perceived well by the reviewers: Making the paper reproducible is important, regardless of whether the code and data are provided or not.
- If the contribution is a dataset and/or model, the authors should describe the steps taken to make their results reproducible or verifiable.
- Depending on the contribution, reproducibility can be accomplished in various ways. For example, if the contribution is a novel architecture, describing the architecture fully might suffice, or if the contribution is a specific model and empirical evaluation, it may be necessary to either make it possible for others to replicate the model with the same dataset, or provide access to the model. In general, releasing code and data is often one good way to accomplish this, but reproducibility can also be provided via detailed instructions for how to replicate the results, access to a hosted model (e.g., in the case of a large language model), releasing of a model checkpoint, or other means that are appropriate to the research performed.
- While NeurIPS does not require releasing code, the conference does require all submissions to provide some reasonable avenue for reproducibility, which may depend on the nature of the contribution. For example
  - (a) If the contribution is primarily a new algorithm, the paper should make it clear how to reproduce that algorithm.
  - (b) If the contribution is primarily a new model architecture, the paper should describe the architecture clearly and fully.
  - (c) If the contribution is a new model (e.g., a large language model), then there should either be a way to access this model for reproducing the results or a way to reproduce the model (e.g., with an open-source dataset or instructions for how to construct the dataset).

781 (d) We recognize that reproducibility may be tricky in some cases, in which case  
782 authors are welcome to describe the particular way they provide for reproducibility.  
783 In the case of closed-source models, it may be that access to the model is limited in  
784 some way (e.g., to registered users), but it should be possible for other researchers  
785 to have some path to reproducing or verifying the results.

## 786 5. Open access to data and code

787 Question: Does the paper provide open access to the data and code, with sufficient instruc-  
788 tions to faithfully reproduce the main experimental results, as described in supplemental  
789 material?

790 Answer: [NA]

791 Justification: This is a theory paper that does not involve code.

792 Guidelines:

- 793 • The answer NA means that paper does not include experiments requiring code.
- 794 • Please see the NeurIPS code and data submission guidelines ([https://nips.cc/](https://nips.cc/public/guides/CodeSubmissionPolicy)  
795 [public/guides/CodeSubmissionPolicy](https://nips.cc/public/guides/CodeSubmissionPolicy)) for more details.
- 796 • While we encourage the release of code and data, we understand that this might not be  
797 possible, so “No” is an acceptable answer. Papers cannot be rejected simply for not  
798 including code, unless this is central to the contribution (e.g., for a new open-source  
799 benchmark).
- 800 • The instructions should contain the exact command and environment needed to run to  
801 reproduce the results. See the NeurIPS code and data submission guidelines ([https://](https://nips.cc/public/guides/CodeSubmissionPolicy)  
802 [nips.cc/public/guides/CodeSubmissionPolicy](https://nips.cc/public/guides/CodeSubmissionPolicy)) for more details.
- 803 • The authors should provide instructions on data access and preparation, including how  
804 to access the raw data, preprocessed data, intermediate data, and generated data, etc.
- 805 • The authors should provide scripts to reproduce all experimental results for the new  
806 proposed method and baselines. If only a subset of experiments are reproducible, they  
807 should state which ones are omitted from the script and why.
- 808 • At submission time, to preserve anonymity, the authors should release anonymized  
809 versions (if applicable).
- 810 • Providing as much information as possible in supplemental material (appended to the  
811 paper) is recommended, but including URLs to data and code is permitted.

## 812 6. Experimental Setting/Details

813 Question: Does the paper specify all the training and test details (e.g., data splits, hyper-  
814 parameters, how they were chosen, type of optimizer, etc.) necessary to understand the  
815 results?

816 Answer: [NA]

817 Justification: This is a theory paper that has no experiments section.

818 Guidelines:

- 819 • The answer NA means that the paper does not include experiments.
- 820 • The experimental setting should be presented in the core of the paper to a level of detail  
821 that is necessary to appreciate the results and make sense of them.
- 822 • The full details can be provided either with the code, in appendix, or as supplemental  
823 material.

## 824 7. Experiment Statistical Significance

825 Question: Does the paper report error bars suitably and correctly defined or other appropriate  
826 information about the statistical significance of the experiments?

827 Answer: [NA]

828 Justification: This is a theory paper that has no experiments section.

829 Guidelines:

- 830 • The answer NA means that the paper does not include experiments.

- The authors should answer "Yes" if the results are accompanied by error bars, confidence intervals, or statistical significance tests, at least for the experiments that support the main claims of the paper.
- The factors of variability that the error bars are capturing should be clearly stated (for example, train/test split, initialization, random drawing of some parameter, or overall run with given experimental conditions).
- The method for calculating the error bars should be explained (closed form formula, call to a library function, bootstrap, etc.)
- The assumptions made should be given (e.g., Normally distributed errors).
- It should be clear whether the error bar is the standard deviation or the standard error of the mean.
- It is OK to report 1-sigma error bars, but one should state it. The authors should preferably report a 2-sigma error bar than state that they have a 96% CI, if the hypothesis of Normality of errors is not verified.
- For asymmetric distributions, the authors should be careful not to show in tables or figures symmetric error bars that would yield results that are out of range (e.g. negative error rates).
- If error bars are reported in tables or plots, The authors should explain in the text how they were calculated and reference the corresponding figures or tables in the text.

## 8. Experiments Compute Resources

Question: For each experiment, does the paper provide sufficient information on the computer resources (type of compute workers, memory, time of execution) needed to reproduce the experiments?

Answer: [NA]

Justification: This is a theory paper that has no experiments section.

Guidelines:

- The answer NA means that the paper does not include experiments.
- The paper should indicate the type of compute workers CPU or GPU, internal cluster, or cloud provider, including relevant memory and storage.
- The paper should provide the amount of compute required for each of the individual experimental runs as well as estimate the total compute.
- The paper should disclose whether the full research project required more compute than the experiments reported in the paper (e.g., preliminary or failed experiments that didn't make it into the paper).

## 9. Code Of Ethics

Question: Does the research conducted in the paper conform, in every respect, with the NeurIPS Code of Ethics <https://neurips.cc/public/EthicsGuidelines>?

Answer: [Yes]

Justification: The research conducted in the paper does conform with the NeurIPS Code of Ethics.

Guidelines:

- The answer NA means that the authors have not reviewed the NeurIPS Code of Ethics.
- If the authors answer No, they should explain the special circumstances that require a deviation from the Code of Ethics.
- The authors should make sure to preserve anonymity (e.g., if there is a special consideration due to laws or regulations in their jurisdiction).

## 10. Broader Impacts

Question: Does the paper discuss both potential positive societal impacts and negative societal impacts of the work performed?

Answer: [NA]

Justification: To our knowledge, this theory paper has no positive/negative social impact.



Guidelines:

- The answer NA means that there is no societal impact of the work performed.
- If the authors answer NA or No, they should explain why their work has no societal impact or why the paper does not address societal impact.
- Examples of negative societal impacts include potential malicious or unintended uses (e.g., disinformation, generating fake profiles, surveillance), fairness considerations (e.g., deployment of technologies that could make decisions that unfairly impact specific groups), privacy considerations, and security considerations.
- The conference expects that many papers will be foundational research and not tied to particular applications, let alone deployments. However, if there is a direct path to any negative applications, the authors should point it out. For example, it is legitimate to point out that an improvement in the quality of generative models could be used to generate deepfakes for disinformation. On the other hand, it is not needed to point out that a generic algorithm for optimizing neural networks could enable people to train models that generate Deepfakes faster.
- The authors should consider possible harms that could arise when the technology is being used as intended and functioning correctly, harms that could arise when the technology is being used as intended but gives incorrect results, and harms following from (intentional or unintentional) misuse of the technology.
- If there are negative societal impacts, the authors could also discuss possible mitigation strategies (e.g., gated release of models, providing defenses in addition to attacks, mechanisms for monitoring misuse, mechanisms to monitor how a system learns from feedback over time, improving the efficiency and accessibility of ML).

## 11. Safeguards

Question: Does the paper describe safeguards that have been put in place for responsible release of data or models that have a high risk for misuse (e.g., pretrained language models, image generators, or scraped datasets)?

Answer: [NA]

Justification: The paper poses no such risks.

Guidelines:

- The answer NA means that the paper poses no such risks.
- Released models that have a high risk for misuse or dual-use should be released with necessary safeguards to allow for controlled use of the model, for example by requiring that users adhere to usage guidelines or restrictions to access the model or implementing safety filters.
- Datasets that have been scraped from the Internet could pose safety risks. The authors should describe how they avoided releasing unsafe images.
- We recognize that providing effective safeguards is challenging, and many papers do not require this, but we encourage authors to take this into account and make a best faith effort.

## 12. Licenses for existing assets

Question: Are the creators or original owners of assets (e.g., code, data, models), used in the paper, properly credited and are the license and terms of use explicitly mentioned and properly respected?

Answer: [NA]

Justification: The paper does not use existing assets.

Guidelines:

- The answer NA means that the paper does not use existing assets.
- The authors should cite the original paper that produced the code package or dataset.
- The authors should state which version of the asset is used and, if possible, include a URL.
- The name of the license (e.g., CC-BY 4.0) should be included for each asset.

- For scraped data from a particular source (e.g., website), the copyright and terms of service of that source should be provided.
- If assets are released, the license, copyright information, and terms of use in the package should be provided. For popular datasets, [paperswithcode.com/datasets](https://paperswithcode.com/datasets) has curated licenses for some datasets. Their licensing guide can help determine the license of a dataset.
- For existing datasets that are re-packaged, both the original license and the license of the derived asset (if it has changed) should be provided.
- If this information is not available online, the authors are encouraged to reach out to the asset's creators.

### 13. New Assets

Question: Are new assets introduced in the paper well documented and is the documentation provided alongside the assets?

Answer: [NA]

Justification: The paper does not release new assets.

Guidelines:

- The answer NA means that the paper does not release new assets.
- Researchers should communicate the details of the dataset/code/model as part of their submissions via structured templates. This includes details about training, license, limitations, etc.
- The paper should discuss whether and how consent was obtained from people whose asset is used.
- At submission time, remember to anonymize your assets (if applicable). You can either create an anonymized URL or include an anonymized zip file.

### 14. Crowdsourcing and Research with Human Subjects

Question: For crowdsourcing experiments and research with human subjects, does the paper include the full text of instructions given to participants and screenshots, if applicable, as well as details about compensation (if any)?

Answer: [NA]

Justification: The paper does not involve crowdsourcing nor research with human subjects.

Guidelines:

- The answer NA means that the paper does not involve crowdsourcing nor research with human subjects.
- Including this information in the supplemental material is fine, but if the main contribution of the paper involves human subjects, then as much detail as possible should be included in the main paper.
- According to the NeurIPS Code of Ethics, workers involved in data collection, curation, or other labor should be paid at least the minimum wage in the country of the data collector.

### 15. Institutional Review Board (IRB) Approvals or Equivalent for Research with Human Subjects

Question: Does the paper describe potential risks incurred by study participants, whether such risks were disclosed to the subjects, and whether Institutional Review Board (IRB) approvals (or an equivalent approval/review based on the requirements of your country or institution) were obtained?

Answer: [NA]

Justification: The paper does not involve crowdsourcing nor research with human subjects.

Guidelines:

- The answer NA means that the paper does not involve crowdsourcing nor research with human subjects.

- 984 • Depending on the country in which research is conducted, IRB approval (or equivalent)  
985 may be required for any human subjects research. If you obtained IRB approval, you  
986 should clearly state this in the paper.
- 987 • We recognize that the procedures for this may vary significantly between institutions  
988 and locations, and we expect authors to adhere to the NeurIPS Code of Ethics and the  
989 guidelines for their institution.
- 990 • For initial submissions, do not include any information that would break anonymity (if  
991 applicable), such as the institution conducting the review.
